1 **TITLE PAGE**

2 **Title:**

3 Unraveling Vulnerabilities in Endocrine Therapy-Resistant HER2+/ER+ Breast Cancer

4

5 **Authors:**

6 Shaymaa Bahnassy<sup>1</sup>, Hillary Stires<sup>2</sup>, Lu Jin<sup>1</sup>, Stanley Tam<sup>1</sup>, Dua Mobin<sup>1</sup>, Manasi Balachandran<sup>3</sup>,

7 Mircea Podar<sup>4</sup>, Matthew D. McCoy<sup>1</sup>, Robert A. Beckman<sup>5</sup>, Rebecca B. Riggins<sup>1\*</sup>

8

9 **Affiliations:**

10 <sup>1</sup>Department of Oncology, Lombardi Comprehensive Cancer Center, Georgetown University,  
11 Washington, DC.

12 <sup>2</sup>Friends of Cancer Research, Washington, DC.

13 <sup>3</sup>Department of Medicine, University of Tennessee Medical Center, Knoxville, TN.

14 <sup>4</sup>Oak Ridge National Laboratory, Oak Ridge, TN.

15 <sup>5</sup>Departments of Oncology and of Biostatistics, Bioinformatics, and Biomathematics, Lombardi  
16 Comprehensive Cancer Center and Innovation Center for Biomedical Informatics, Georgetown  
17 University Medical Center, Washington, DC

18

19 **Running title:** Characterizing Endocrine-therapy resistance HER2+/ER+ Breast Cancer

20

21 **Keywords:** Breast cancer; Endocrine resistance; HER2+/ER+; Human epidermal growth factor  
22 receptor 2

23

24 **\*Corresponding Author:** Rebecca B. Riggins, 3970 Reservoir Rd NW, E412 Research Bldg,  
25 Washington, DC 20057, email [rbr7@georgetown.edu](mailto:rbr7@georgetown.edu)

26

27 **Funding:** This work was funded by the Department of Defense (DoD) Breast Cancer Research  
28 Program awards W81XWH-20-1-0759 and W81XWH-20-1-0760 (to RBR and RAB,  
29 respectively), the Oak Ridge National Laboratory Director's R&D fund (to MP and RAB), and  
30 philanthropy support from Lombardi Women at Georgetown Lombardi's Nina Hyde Center for  
31 Breast Cancer Research (to RBR). Fellowship support for HS and ST was provided by the  
32 Tumor Biology Training Grant T32 CA009686 (principal investigator (PI): Dr. Anna T. Riegel).  
33 DM received support from the Georgetown Regents Scholars Program. Technical services were  
34 provided by the GUMC Genomics and Epigenomics, Microscopy and Imaging, and Tissue  
35 Culture Shared Resources, which are supported, in part, by NIH/NCI Cancer Center Support  
36 Grant P30 CA051008 (PI: Dr. Louis M. Weiner). The content of this article is the sole  
37 responsibility of the authors and does not represent the official views of the DoD or NIH.

38

39 **Disclosures:** SB, HS, LJ, ST, DM, MB, MP, and MDM have nothing to declare. RAB consults  
40 for AstraZeneca LP and Boehringer Ingelheim, and is the Chief Scientific Officer and Managing  
41 Member of Onco-Mind, LLC, which owns patents related to cancer precision medicine. RBR is  
42 an Associate Editor for the Journal of the Endocrine Society.

43

44 **ABSTRACT**

45 **Background**

46 Breast tumors overexpressing human epidermal growth factor receptor (HER2) confer intrinsic  
47 resistance to endocrine therapy (ET), and patients with HER2/ estrogen receptor-positive  
48 (HER2+/HR+) breast cancer (BCa) are less responsive to ET than HER2-/ER+. However, real-  
49 world evidence reveals that a large subset of HER2+/ER+ patients receive ET as monotherapy,  
50 positioning this treatment pattern as a clinical challenge. In the present study, we developed and  
51 characterized two distinct *in vitro* models of ET-resistant (ETR) HER2+/ER+ BCa to identify  
52 possible therapeutic vulnerabilities.

53

54 **Methods**

55 To mimic ETR to aromatase inhibitors (AI), we developed two long-term estrogen-deprived  
56 (LTED) cell lines from BT-474 (BT474) and MDA-MB-361 (MM361). Growth assays, PAM50  
57 molecular subtyping, genomic and transcriptomic analyses, followed by validation and functional  
58 studies, were used to identify targetable differences between ET-responsive parental and ETR-  
59 LTED HER2+/ER+ cells.

60

61 **Results**

62 Compared to their parental cells, MM361 LTEDs grew faster, lost ER, and increased HER2  
63 expression, whereas BT474 LTEDs grew slower and maintained ER and HER2 expression.  
64 Both LTED variants had reduced responsiveness to fulvestrant. Whole-genome sequencing of  
65 the more aggressive MM361 LTED model system identified exonic mutations in genes encoding  
66 transcription factors and chromatin modifiers. Single-cell RNA sequencing demonstrated a shift  
67 towards non-luminal phenotypes, and revealed metabolic remodeling of MM361 LTEDs, with  
68 upregulated lipid metabolism and antioxidant genes associated with ferroptosis, including

69 *GPX4*. Combining the *GPX4* inhibitor RSL3 with anti-HER2 agents induced significant cell death  
70 in both the MM361 and BT474 LTEDs.

71

## 72 **Conclusions**

73 The BT474 and MM361 AI-resistant models capture distinct phenotypes of HER2+/ER+ BCa  
74 and identify altered lipid metabolism and ferroptosis remodeling as vulnerabilities of this type of  
75 ETR BCa.

## 76 INTRODUCTION

77 Globally, breast cancer (BCa) remains the leading cause of cancer-related mortality in women  
78 (1). Human epidermal growth factor receptor positive/ hormone receptor positive (HER2+/HR+)  
79 tumors account for approximately 10% of all BCa cases and 60% of HER2+ tumors (2). HER2+/  
80 estrogen receptor positive (ER+) and HER2+/ER- BCa have distinct biology and are proposed  
81 as two distinct disease subtypes (3,4). Prior and recent studies reported favorable prognosis and  
82 overall survival (OS) as well as lower-grade tumors in HER2+/ER+ BCa compared to  
83 HER2+/ER- BCa patients (5-8). However, HER2+/ER+ BCa has low response rates to anti-  
84 HER2 therapy compared to HER2+/ER- tumors (9,10), have a limited antiproliferative response  
85 to endocrine therapy (ET), and are at a higher risk of recurrence (2,10,11).

86

87 Concurrent blockade of both HER2 and ER pathways in patients with advanced/metastatic  
88 HER2+/ER+ BCa is becoming increasingly evident as an effective treatment strategy. In clinical  
89 trials, postmenopausal women receiving combinations of ET plus anti-HER2 as first-line therapy  
90 showed improvements in progression-free survival (PFS) and/or other clinical benefits (12-14).  
91 Likewise, a retrospective study of the national cancer database showed the highest 5-year OS  
92 among those receiving this combination therapy vs. ET alone, chemotherapy alone or anti-HER2  
93 + chemotherapy (15). Unfortunately, outside of clinical trials a large subset (36.7-60%) of  
94 HER2+/ER+ patients receive hormonal treatment as a monotherapy (15,16). Although current  
95 guidelines recommend anti-HER2 agents (trastuzumab + pertuzumab; TP) plus chemotherapy  
96 as first-line standard of care for advanced HER2+ disease irrespective of HR status, endocrine  
97 monotherapy remains an option for selected HER2+/ER+ patients that have low disease burden  
98 or intolerance to chemotherapy (17,18). Moreover, antibody-based anti-HER2 therapy is mainly  
99 given to patients with primary HER2+/ER+ BCa for one year, while ET is usually given longer (at  
100 least five years) (2). Thus, residual HER2+/ER+ disease after surgery, not subjected to anti-  
101 HER2 therapy, remains at high risk of incomplete response or resistance to prolonged ET.

102

103 A shorter time to recurrence in patients with HER2+ disease, compared to HER2-, treated with  
104 single-agent ET as tamoxifen or anastrozole was reported (19). Likewise, compelling evidence  
105 from preclinical and clinical data strongly suggests that HER2 overexpression confers intrinsic  
106 resistance to ET and that HER2+/ER+ BCa are less responsive to ET than HER2-/ER+ tumors  
107 (2,10,20). Multiple studies have further established that bi-directional crosstalk between ER and  
108 HER2 signaling pathways mediates resistance to ET (21-23). While acquired ET resistance is  
109 extensively studied in HER2-/ER+ BCa, preclinical models of HER2+/ER+ BCa that have  
110 acquired resistance to ET are lacking. Existing models of resistance have been generated by  
111 genetic manipulations of ER and/or HER2, for example (24,25).

112

113 Collectively, there is an unmet need to develop, characterize and study therapeutic responses  
114 of ET-resistant (ETR) HER2+/ER+ models to HER2- and other ER-directed therapies. In this  
115 study, we establish ETR variants through long-term estrogen deprivation (LTED) to mimic  
116 resistance to aromatase inhibitors (AI) from two HER2+/ER+ BCa cell lines (BT474 and MDA-  
117 MB-361, (26,27)). To identify therapeutic vulnerabilities between AI-responsive-parentals and  
118 ETR-LTEDs of HER2+/ER+ BCa cell lines, we performed growth assays, PAM50 molecular  
119 subtyping, genomic and transcriptomic analyses. Our data shows that the BT474 and MM361  
120 ETR models capture distinct phenotypes of HER2+/ER+ BCa and highlight altered lipid  
121 metabolism and ferroptosis remodeling as features of this ETR BCa.

122

## 123 **METHODS**

### 124 **Treatments, Cell Lines, and Cell Culture**

125 Trastuzumab and pertuzumab were obtained from Genentech, SYTOX green (S7020) and  
126 Hoechst 33342 (H1399) from ThermoFisher, fulvestrant (S1191) from Selleck Chemicals,  $\beta$ -  
127 estradiol (E8875) from Sigma Aldrich and RSL3 (HY-100218A) from MedChemExpress.

128

129 MDA-MB-361 (MM361; RRID:CVCL\_0620) and BT-474 (BT474; RRID:CVCL\_0179) human  
130 breast carcinoma cell lines were obtained from the Tissue Culture and Biobanking Shared  
131 Resource at Lombardi Comprehensive Cancer Center and were routinely checked for  
132 *Mycoplasma* contamination. Both cell lines were cultured in improved Minimum Essential  
133 Medium (IMEM; Gibco) media supplemented with 10% FBS at 37°C in a humidified atmosphere  
134 containing 5% CO<sub>2</sub>. We generated two LTED variants A and B cells from their corresponding  
135 parental cell lines by chronically passaging parental cell lines in phenol red-free IMEM media  
136 (Gibco) supplemented with 10% charcoal-stripped bovine serum (CSS; Vita Scientific) for over  
137 six months. After developing resistance, the derived cells were used and continuously cultivated  
138 in 10% CSS phenol red-free IMEM.

139

#### 140 **Growth Assays**

141 Differences in growth kinetics between parental and corresponding LTEDs were evaluated by  
142 the trypan blue exclusion assay. Cells were seeded at a density of 100,000 cells/well in 24-well  
143 plates. After trypsinization and staining with trypan blue, live cell counts using the Countess II  
144 Automated Cell Counter (ThermoFisher Scientific) were recorded on days 0 (24 h), 2, 4, 6, 8,  
145 and 10 from cell seed.

146

147 For crystal violet assays, parental and LTED cells were seeded in 96-well plates at 5,000  
148 cells/well. Forty-eight hours later, cells were subjected to indicated treatments for six additional  
149 days. Treatments were replenished three days after treatment onset. At the end of the  
150 experiments, cells were stained with 0.5% crystal violet in 25% methanol. Once plates were  
151 dried, the stain was resolubilized with citrate buffer, and absorbance measurements were  
152 obtained from the ELx808 plate reader (BioTek).

153

154 **Cell Death Quantification**

155 Cells were seeded in 24-well plates at a cell density of 150,000 cells/well, incubated overnight,  
156 then subjected to treatments as indicated. After 72 h of treatments, cells were stained with both  
157 Hoechst 33342 (0.1 µg/mL) to monitor total cell number, and Sytox green (5 µM) to monitor  
158 dead cells. Images were acquired using the Olympus IX71 microscope and subsequently  
159 analyzed by Image J. Percentage cell death was calculated as Sytox green cell number over  
160 total cell number.

161

162 **Western Blot Analysis**

163 Whole-cell protein extracts were denatured, resolved on NuPAGE 4-12% Bis-Tris gels  
164 (ThermoFisher), and either transferred onto nitrocellulose membranes using iBlot 2 dry transfer  
165 apparatus (ThermoFisher) or PVDF membranes using the BioRad wet transfer apparatus. After  
166 blocking, blots were probed overnight, and the following primary antibodies were used: ER (Cell  
167 Signaling Technology Cat# 8644, RRID:AB\_2617128), EGFR (Cell Signaling Technology Cat#  
168 2232, RRID:AB\_331707), HER2 (Cell Signaling Technology Cat# 2242, RRID:AB\_331015),  
169 pHER2 (Cell Signaling Technology Cat# 2241, RRID:AB\_2099407), HER3 (Cell Signaling  
170 Technology Cat# 12708, RRID:AB\_2721919), HER4 (Cell Signaling Technology Cat# 4795,  
171 RRID:AB\_2099883) , AKT (Cell Signaling Technology Cat# 4691, RRID:AB\_915783), pAKT  
172 (Cell Signaling Technology Cat# 9271, RRID:AB\_329825), β-actin (Cell Signaling Technology  
173 Cat# 3700, RRID:AB\_2242334), vinculin (Cell Signaling Technology Cat# 13901,  
174 RRID:AB\_2728768), 4-HNE (Abcam Cat # ab46545, RRID: AB\_722490), GPX4 (Abcam Cat#  
175 ab125066, RRID:AB\_10973901), MDA (Thermo Fisher Scientific Cat# MA5-27559,  
176 RRID:AB\_2735264) and GAPDH (Proteintech Cat# 60004-1-Ig, RRID:AB\_2107436). After one  
177 hour of incubation with secondary antibody (either anti-mouse (Cell Signaling Technology Cat#  
178 7076, RRID:AB\_330924) or -rabbit (Cell Signaling Technology Cat# 7074, RRID:AB\_2099233))



179 and washes, antigen-antibody complexes were detected by the chemiluminescence  
180 WesternBright ECL Detection Reagent (Advansta) and imaged using the Amersham Imager 600  
181 (GE Healthcare Life Sciences).

182

### 183 **Real-time PCR (qRT-PCR)**

184 Total RNA of biological triplicates was extracted from cells using the PureLink RNA Mini Kit  
185 (ThermoFisher) and converted to cDNA with iScript cDNA Synthesis Kit (BioRad) according to  
186 manufacturer's instructions. Expression of target genes with specific primers (sequences listed  
187 in Table S1 (28); synthesized by IDT) was measured by RT-qPCR using the iTaq Universal  
188 SYBR Green Supermix (BioRad) and QuantStudio 12K Flex Real-Time PCR System  
189 (ThermoFisher). Data were normalized to the  $\beta$ -actin housekeeping gene and analyzed by the  
190  $\Delta\Delta$ CT method.

191

### 192 **Single-Cell RNA Sequencing (scRNAseq)**

193 The scRNAseq was performed using the Drop-seq approach described by Macosko *et al.* (29)  
194 with updates and detailed workflow from the McCarroll lab at Harvard Medical School  
195 (<https://mccarrolllab.org/dropseq/>). To generate the droplet emulsion and cell encapsulation we  
196 used a Dolomite-Bio  $\mu$ Encapsulation system (Dolomite-Bio) according to manufacturer's  
197 instructions. Barcoded beads were purchased from Chemgenes, as specified by (29). Briefly,  
198 trypsinized MM361 parental and LTED cells were washed, and resuspended in PBS-0.01%  
199 BSA. The single-cell suspension, bead suspension, and the droplet generation oil were loaded  
200 into their respective containers and connected via high precision pumps to the scRNA chip as  
201 part of the  $\mu$ Encapsulation system. The flow rates were adjusted so that each droplet generated  
202 encapsulated one bead and one cell and monitored under the system's high speed digital  
203 microscope. Droplets were collected, and a small aliquot was examined microscopically to

204 ensure uniformity of bead size and occupancy. The beads were washed and used for reverse  
205 transcription/cDNA synthesis and PCR according to the drop-seq workflow. The PCR products  
206 were purified, pooled, and quantified in a BioAnalyzer High Sensitivity Chip (Agilent).  
207 Sequencing libraries were prepared using the Nextera XT DNA sample prep kit (Illumina Inc)  
208 following manufacturer's protocol. The libraries were purified, quantified, and sequenced by  
209 GenWiz on an Illumina High-Seq instrument using 2x150 nt reads.

210

211 Raw data was imported into the Seurat R package (30). All cells with unique feature counts  
212 between 200 and 2500 and a percentage of mitochondrial reads less than 5% were selected for  
213 further analysis. After scaling, dimensional reduction, and cell type specific marker identification  
214 with default parameters, we discovered 7 different clusters among LTED and parental cell lines.  
215 Differentially expressed genes ( $p < 0.05$ ) were calculated between all three experimental  
216 groups. A combined LTED and parental cell lines UMAP was generated with 10 PC and 0.5  
217 resolution. We also performed PAM50 molecular classification using geneFu R package (31) at  
218 single-cell resolution; a treatment split UMAP was generated with the same settings.

219

## 220 **Gene Set Enrichment Assay (GSEA)**

221 Differentially expressed genes were matched against the REACTOME signature from the  
222 Human Molecular Signature Database (MSigDB) using the GSEA portal  
223 (<http://software.broadinstitute.org/gsea/index.jsp>) (32), with false discovery rate (FDR) q-values  
224  $< 0.05$ . Top 20 enriched pathways and their corresponding  $-\log(p\text{-value})$  were graphed.

225

## 226 **Whole Genome Sequencing (WGS)**

227 DNA was extracted from cells using the DNeasy Blood and Tissue Kit (Qiagen) according to  
228 manufacturer's instructions. The Genomics and Epigenomics Shared Resource (GESR) at  
229 Georgetown University Medical Center performed the WGS. Paired-end, indexed libraries for

230 human WGS were constructed from 1.0 µg of gDNA using the TruSeq DNA PCR-Free Library  
231 Prep Kit (Illumina) according to the manufacturer's instructions. Briefly, DNA was fragmented  
232 using a Covaris M220 Focused-ultrasonicator (Covaris) using settings for a 350-bp insert size.  
233 Library quality was assessed with a BioAnalyzer 2100 using the High Sensitivity DNA kit  
234 (Agilent Technologies). The libraries were quantified using the Kapa Library Quantification Kit  
235 Illumina Platforms (Kapa Biosystems). The denatured and diluted libraries were sequenced on a  
236 NextSeq 550 System (Illumina) using v2.5 High Output 300 cycle kit with 1% PhiX to an  
237 average sequencing depth of 50x coverage.

238

239 The quality of raw sequence data (fastq or fastq.gz files) was checked by FastQC v0.11.9 (33),  
240 and Cutadapt v3.5 was used for adapter trimming of raw data (34). After trimming, reads with  
241 low quality (quality score < 33, error rate > 10%) and lengths less than 25 bp were eliminated.  
242 Processed reads were then aligned to GRCh38 reference sequence using the bwa v0.7.17  
243 paired-end mode (35). Mutation detection was conducted in Genome Analysis Toolkit (GATK)  
244 v4.1.9.0 (36) following the best practice for variant calling workflow. SigProfiler (37) on COSMIC  
245 Mutational Signatures version 3.2 was used to classify single base substitution (SBS) in WGS  
246 data.

247

## 248 **Statistical Analysis**

249 All results are expressed as mean ± SEM. Prism 9 (GraphPad Software) was used for data  
250 analysis. Unless otherwise noted, one-way ANOVA followed by Tukey's or Dunnett's multiple  
251 comparison tests were employed to evaluate statistical significance between groups and *p*-  
252 values < 0.05 were considered statistically significant.

253

## 254 **RESULTS**

255 ***Patients of the HER2+ BCa subtype expressing high levels of ESR1 exhibit lower risk for***  
256 ***metastasis***

257 We analyzed a publicly available database to evaluate patients' survival rates of HER2+ BCa  
258 stratified by their HR status. Regardless of HR status, five-year survival rates from the SEER  
259 database for patients with HER2+ BCa decrease with disease progression and are the lowest  
260 for late (distant)-stage HER2+ BCa (**Fig. 1A**). Next, we specifically focused on ER and  
261 compared survival rates of HER2+ BCa patients as stratified by high and low estrogen receptor  
262 alpha gene (*ESR1*) expression. Ten-year survival data from the Kaplan-Meier Plotter database  
263 (38) show no difference in overall survival (OS) and relapse-free survival (RFS) between  
264 patients expressing high or low levels of *ESR1* (**Fig. 1B** and **1C**, respectively). On the contrary,  
265 patients expressing high levels of *ESR1* show higher probability for distant metastasis-free  
266 survival (DMFS) (logrank  $P = 0.035$ , **Fig. 1D**), and thus lower risk for metastasis. This lower  
267 susceptibility for metastasis suggests correlation of high ER expression with better prognosis  
268 within the advanced setting of HER2+ BCa disease.

269

270 ***Growth patterns and responses to HER2- and ER-targeted therapies of HER2+/ER+***  
271 ***LTEDs differ from their parental counterparts***

272 To mimic acquired ETR to AI, we generated two LTED variants (A and B) from each of the two  
273 HER2-amplified, HER2+/ER+ BCa cell lines (**Fig. 2A** and **2B**): BT474 and MM361 (26,27). We  
274 first compared proliferation behaviors of LTEDs versus their corresponding parental cell lines  
275 grown in media supplemented with either FBS or CSS (CSS represents short-term hormone  
276 starvation). BT474 LTEDs had significantly lower growth rates than their respective parentals  
277 grown in FBS media but were not different from parentals in CSS media (**Fig. 2C** left panel). On  
278 the other hand, MM361 LTEDs grew faster than parentals in CSS and FBS media (**Fig. 2C** right  
279 panel). Increased growth rates of MM361 LTEDs in CSS media are suggestive of hormone-

280 independent growth and a more aggressive nature (LTEDs being more aggressive than  
281 parentals), consistent with the isolation of MM361 from brain metastatic BCa (39).

282

283 Next, we evaluated our HER2+/ER+ parental/LTED pair growth response to HER2- and ER-  
284 targeted therapies: dual HER2 blockade by TP, and fulvestrant (ICI) as a selective estrogen  
285 receptor degrader (SERD). For BT474, LTED growth was significantly inhibited by TP and  
286 minimally inhibited by ICI, whereas both TP and ICI caused significant growth inhibition of  
287 parental cells (**Fig. 2D**, left panel). Compared to parental MM361, both MM361 LTED variants  
288 were also less responsive to ICI but more responsive to TP. Additionally, results from western  
289 blot analysis showed no difference in ER protein levels of BT474 and MM361 LTEDs upon  
290 treatment with ICI versus vehicle, supporting the loss of ICI-mediated growth inhibition in  
291 HER2+/HR+ ETR LTEDs (**Fig. S1A** and **S1B**, (28)). Altogether, data shows that our two  
292 HER2+/ER+ LTED models differ from their parental counterparts in base line growth and  
293 responses to HER2- and ER-targeted therapies.

294

295 ***MM361, but not BT474, LTEDs lose ER expression and E2-induced ER target gene***  
296 ***expression***

297 We further characterized our HER2+/ER+ ETR models to determine if alterations in the basal  
298 expression of ER and HER family members may explain observed differential growth inhibition  
299 of parental/LTED pair models to anti-HER2 and ER treatments. When compared to their  
300 corresponding parentals, BT474 LTEDs showed no substantial changes in ER protein or *ESR1*  
301 transcript levels, whereas a significant reduction of both was observed in MM361 LTEDs (**Fig.**  
302 **3A to 3C**). Additionally, ER transcriptional activity was confirmed by increased expression of  
303 ER-target genes (*PGR* and *TFF1*) upon E2 stimulation only in LTEDs of BT474, but not MM361  
304 (**Fig. 3D**). Protein analysis of the HER family revealed a significant upregulation of EGFR and a  
305 modest increase of HER3 in BT474 LTEDs (**Fig. 3A** and **3B**). A significant increase in HER2

306 and/or modest increase in EGFR (which is able to form heterodimers with HER2 (40)) protein  
307 levels of MM361 LTEDs (**Fig. 3A** and **3B**) may explain why these cells responded better to  
308 growth inhibition by TP than parentals (**Fig. 2D**). LTED variants of both BT474 and MM361 cell  
309 lines showed activation of the pro-survival AKT signaling (pAKT) downstream of HER2 (**Fig. 3A**  
310 and **3B**).

311  
312 ***MM361 LTEDs gain basal-like and HER2-enriched intrinsic subtypes and exonic***  
313 ***mutations in genes encoding transcription factors and chromatin modifiers***

314 Resistance to ET may arise due to changes in gene transcription and/or mutational alterations.  
315 The loss/downregulation of ER and increase in HER2 expression in the MM361 LTED model  
316 (**Fig. 3**), coupled with their more rapid adaptation to LTED conditions and increased growth rate  
317 vs. parentals (**Fig. 2C**), raised the question of whether this model has shifted its intrinsic  
318 subtypes. Data from the SONABRE registry study supports this notion, reporting that  
319 HER2+/ER+ BCa has the highest rate of subtype discordance at metastatic presentation (41).  
320 We therefore prioritized the MM361 LTED model for further transcriptomic and genomic  
321 analyses to identify putative molecular mechanisms driving resistance. We first performed  
322 scRNAseq and analyzed the molecular subtype of individual cells using PAM50. MM361 LTEDs  
323 intrinsic subtyping is discordant from its parentals. As might be predicted from their  
324 loss/downregulation of ER expression at the mRNA and protein levels, LTEDs demonstrated a  
325 shift towards non-luminal HER2-enriched (HER2-E) and basal-like phenotypes (**Fig. 4A** and  
326 **4B**). Additionally, we performed whole-genome sequencing to identify mutations gained in  
327 MM361 LTED. Analysis of SBS mutational signatures from our WGS data showed an  
328 enrichment in C to T base substitutions (SBS1) as well as T to C base substitutions (SBS5)  
329 across the genome of MM361 LTEDs compared to the parental cell line (**Fig. 4C**). These aging-  
330 related, clock-like mutational signatures are prevalent in many cancer types, though SBS1  
331 mutations were recently reported to be enriched in breast cancer metastases in an age-

332 independent manner (42). Next, we focused on mutated genes at their exonic regions. MM361  
333 LTEDA and B shared a total of 70 genes bearing mutations in their exonic regions when  
334 compared to their parental cells (**Fig. 4D**). After excluding the 22 genes with silent mutations  
335 and characterizing the mutational signatures of the remaining 48, C to T and C to A were the  
336 most predominant mutation types (**Fig. 4E** and **Table S2** (28)). Most of these mutated genes  
337 were modestly deleterious (**Fig. 4F**) as predicted by Varmap (43). These genes mainly encode  
338 for transcription factors and chromatin modifiers, namely *HEY1*, *CHD4*, *MAFF*, *PRDM14*,  
339 *SATB2*, *SUPT6H*, *ZNF135*. Importantly, mutation of one or more of these genes is significantly  
340 enriched in ETR advanced breast cancers that are HER2+ and/or progesterone receptor-  
341 negative (PR-; **Fig. S2A** and **S2B** (28)). Together, these data show that a shift towards more  
342 aggressive intrinsic molecular subtypes (basal and HER2-enriched) and acquiring mutated  
343 transcription factors and chromatin modifiers accompanies the development of ETR in the  
344 MM361 LTED model.

345

#### 346 ***Lipid metabolism pathways are upregulated in the MM361 LTEDs***

347 Using our scRNAseq data, we performed unsupervised clustering using Seurat to identify over-  
348 and under-represented cell populations in MM361 parental and LTED A and B cells (**Fig. S3**  
349 (28)). We identified seven clusters, with clusters 2 and 5 enriched in parental cells and clusters  
350 0 and 6 enriched in LTED cells (**Fig. S3A** to **S3C** (28)). GSEA analysis showed that parental-  
351 dominant clusters 2 and 5 were enriched with genes regulating estrogen response, glycolysis,  
352 TCA cycle, and oxidative phosphorylation (**Fig. S3D** (28)). By contrast, LTED-dominant clusters  
353 showed a significant overrepresentation of fatty acid metabolism (in the more abundant cluster  
354 0), and RNA processing pathways e.g., nonsense-mediated decay (in the less abundant cluster  
355 6). We then constructed “pseudo-bulk” profiles from scRNAseq and performed differential  
356 expression analysis of transcriptomic changes that characterize MM361 LTEDA and B vs.  
357 parental cells. Transcriptional profiling at a false discovery rate (FDR) <0.05 and a log2 fold

358 change  $\leq -0.5$  and  $\geq 0.5$  identified a total of 356 differentially expressed genes (DEG) between  
359 parental and LTEDA, and 674 DEG between parental and LTEDB (**Fig. 5A**). The intersection of  
360 DEG from LTED vs. parental comparisons resulted in 202 DEG between both LTED lines and  
361 parental cells, with 156 and 46 genes being upregulated and downregulated, respectively (**Fig.**  
362 **5B** and **Table S3** (28)). We validated the transcriptomic analysis of MM361 LTEDs and  
363 confirmed the increased expression of eleven upregulated DEGs using qRT-PCR (**Fig. 5C**).  
364 Importantly, *ESR1* and *TFF1* were among the top downregulated genes and *ERBB2* expression  
365 was upregulated (**Fig. S4** (28)), consistent with data shown in **Fig. 3**. Using LISA (44) to predict  
366 the transcriptional regulators (TRs) of these DEGs (**Table S3** (28)), we found that the steroid  
367 hormone receptors *PGR*, *ESR1*, and *AR*, as well as the pioneer factors *GRHL2* and *FOXA1*  
368 were among the most enriched TRs in common for both up- and downregulated DEGs.  
369 Predicted TRs associated exclusively with downregulated DEGs included *E2F1*, *RARA*, and  
370 *MAFB* (a homolog of *MAFF*, which we identified as mutated in LTED cells, **Table S2** (28)).  
371 Predicted TRs for upregulated DEGs included *GATA2*, *PPARG*, and *CEBPA*.

372  
373 To identify biological processes that are enriched within the LTED variants, we performed GSEA  
374 on the upregulated and downregulated shared gene lists of both LTED lines vs. parental cells.  
375 Genes upregulated in LTEDs were enriched in pathways involved in defective apoptosis and  
376 immune-related pathways. Conversely, pathways involved in estrogen and other nuclear  
377 receptor signaling were enriched within the downregulated gene set (**Fig. 5D**). Notably,  
378 metabolic pathways were among the enriched pathways in the MM361 LTEDs. While lipid  
379 metabolism was upregulated, pathways of glucose metabolism, glycolysis and gluconeogenesis  
380 were all downregulated (**Fig. 5D**), consistent with our unsupervised clustering analysis results  
381 (**Fig. S3** (28)). The upregulation of lipid metabolism pathways is also supported by the observed  
382 enrichment of putative TRs *PPARG* and *CEBPA* from our upregulated DEGs (**Table S3** (28)),



383 which are key activators of lipid metabolism (45). Our data suggest notable metabolic  
384 remodeling of MM361 LTEDs, specifically upregulation of lipid metabolism.

385

### 386 ***Dual targeting of HER2 and GPX4 increase cell death of HER2+/ER+ LTEDs***

387 *ALOX15B* and *GPX4* are two of the upregulated genes of lipid metabolism pathways enriched in  
388 the MM361 LTEDs (**Fig. 5D** and **5E**). In addition, *ALOX15B* and *GPX4* were among the 13  
389 MM361 LTED DEGs that overlapped with ferroptosis-related genes (**Fig. S5** (28)). Ferroptosis is  
390 an iron-dependent cell death that is triggered by lipid peroxidation (46). Interestingly, both  
391 upregulated proteins are opposing key players in regulating ferroptosis (47); *ALOX15B* induces  
392 ferroptosis, whereas *GPX4* inhibits it. We validated the upregulation of *ALOX15B* mRNA in  
393 MM361 LTEDs (**Fig. 5C**), and *GPX4* protein levels in both MM361 and BT474 LTEDs (**Fig. 6A**  
394 and **S6A** (28)).

395

396 Inhibiting the PI3K-AKT-mTOR signaling pathway – which we show in **Fig. 3** is strongly  
397 activated in both MM361 and BT474 LTED cells – can sensitize BCa cells to ferroptosis  
398 induction, in part by reducing SREBP-mediated lipogenesis (48). Therefore, we hypothesized  
399 that LTED cells of HER2+/ER+ BCa are resistant to ferroptosis, due to *GPX4* upregulation, and  
400 that dual targeting of HER2 (upstream of PI3K-AKT-mTOR) and *GPX4* may sensitize these  
401 LTEDs to ferroptosis-induced cell death. In MM361 LTEDs, significant cell death was observed  
402 following HER2 inhibition by TP, but not *GPX4* inhibition by RSL3 (**Fig. 6B** and **6C**). In BT474  
403 LTEDs, TP and RSL3 alone each significantly increased cell death (**Fig. S6B** and **S6C** (28)).  
404 Importantly, in both LTED models, cell death was significantly enhanced by the combination of  
405 TP + RSL3. As expected, TP alone reduced the activation of AKT (pAKT) and RSL3 alone  
406 reduced protein levels of *GPX4* (**Fig. 6D**), but no further reduction was observed with TP +  
407 RSL3 vs. that of the single treatments (**Fig. 6D**). To test whether the increased cell death  
408 induced by the TP + RSL3 combination was due to ferroptosis, we measured the levels of two

409 ferroptosis lipid peroxidation markers, 4-hydroxynonenal (4-HNE) and malondialdehyde (MDA)  
410 (**Fig. S7** (28)). RSL3 alone slightly increased levels of both 4-HNE and MDA, but TP + RSL3 did  
411 not further enhance the levels of 4-HNE and MDA protein conjugates. Together, these data  
412 suggest that increased lipid metabolism in HER2+/ER+ BCa LTED models is accompanied by  
413 reprogramming of ferroptosis pathways, and that the combination of anti-HER2 agents and a  
414 ferroptosis inducer is an effective approach to inducing cell death.

415

## 416 **DISCUSSION**

417 To date, models of acquired ETR have been almost exclusively developed for HER2-/ER+ BCa,  
418 and not HER2+/ER+. In this study, we generated and characterized models of the latter without  
419 using genetic manipulation approaches. We report that ETR BT474 and MM361 AI-resistant  
420 (LTED) models capture distinct phenotypes of HER2+/ER+ BCa as supported by the following  
421 results. Compared to parentals, MM361 LTEDs grew faster, lost ER, and increased HER2  
422 expression, whereas BT474 LTEDs grew slower and showed no substantial changes in ER or  
423 HER2 expression. Additionally, growth inhibition by anti-HER2 (TP) treatment was much more  
424 pronounced in the LTEDs vs. parental MM361, unlike the BT474 model, where both LTEDs and  
425 parentals benefited from TP. Differences in ER and HER2 expression in the LTEDs of MM361  
426 and BT474 models may suggest distinct resistance mechanisms to ET partly due to the  
427 differential distribution of intrinsic subtypes within these two cell lines. It could imply that BT474  
428 ETR behaves more like luminal whereas MM361 LTEDs behaves more like non-luminal HER2+  
429 BCa and hence the more aggressive nature of the latter.

430

431 HR and HER2 receptor expressions, or lack thereof, are critical in guiding BCa treatments.  
432 However, pathology-based immunohistochemistry (IHC) does not fully recapitulate intrinsic  
433 biology. Instead, substantial discrepancies exist between IHC-based and gene expression-  
434 based PAM50 subtyping (49). Our results show that MM361 LTEDs intrinsic subtyping is

435 discordant from its parentals. We observed a loss in ER/*ESR1* accompanied by a gain in  
436 HER2/*ERBB2* expression and, thus, molecular switching to non-luminal HER2-E phenotype and  
437 sustained activation of AKT signaling. These alterations altogether explain why our ETR MM361  
438 LTEDs were less responsive to ICI but more responsive to anti-HER2 targeted therapies vs.  
439 their corresponding TP-resistant parentals. HER2-E subtype represents ~75% HER2+/HR- and  
440 30% of HER2+/HR+ tumors (49,50), is associated with anti-HER2 sensitivity (49), and is a  
441 predictive biomarker of poor response and resistance to AI (10). Our findings are supported by  
442 several studies. First, data from the SONABRE registry (NCT03577197) show that among all  
443 BCa subtypes, patients with HR+/HER2+ advanced BC exhibit the highest receptor subtype  
444 discordance rate between primary tumor and metastatic lesions as they convert mainly to  
445 HR+/HER2- and HR-/HER2+ (41). In other words, ER and HER2 expressions varied during  
446 tumor progression, and cross-talk between ER and HER2 was proposed as the leading cause of  
447 this discordance (41). Second, HER2 and ER expressions are negatively correlated in HER2+  
448 BCa tumors (51). Third, cell lineage tracing experiments in mice showed that HER2+/ER+ cells  
449 can lose ER expression and be converted into highly aggressive HER2+/ER- BCa cells (52).  
450 Lastly, HER2 overexpression (with or without EGFR) activates downstream AKT and MAPK  
451 pathways to circumvent ER inhibition and promotes growth of ETR BCa (2,25,53). ER loss in our  
452 MM361 ETR model could be explained by *ESR1* promoter methylation and/or decreased FOXA1  
453 and GATA3, which are required for normal ER expression (52). Additionally, losing the ER-  
454 regulated cluster of let-7c, miR99a, and miR125b (54), could explain our upregulated HER2  
455 expression.

456

457 Beyond the HER2-E intrinsic subtype, acquiring mutations in genes encoding for transcription  
458 factors and chromatin modifiers could underlie mechanisms of AI resistance and/or the  
459 aggressive nature of the MM361 LTED model. For example, integrated genomic analysis of  
460 responding vs. resistant ER+ breast tumors from a patient who developed resistance to

461 letrozole treatment revealed an acquired mutation in the *CHD4* gene (55). SUPT6H protein  
462 levels decrease in poorly differentiated breast tumors, and SUPT6H is a requirement for ER $\alpha$   
463 transcriptional activity and maintenance of chromatin structure in BCa cells (56). Also, SATB2  
464 induces transformation of mammary epithelial cells into progenitor-like cells and its knockdown  
465 attenuates proliferation and epithelial-mesenchymal transition (EMT) of BCa cells (57). What  
466 role the mutations in these genes that we observe in MM361 LTEDs play in the ETR phenotype  
467 is a subject of future study.

468

469 BCa cells carrying *PIK3CA* activating mutation (like the parental BT474 and MM361 cells (58)),  
470 and thus an activated PI3K-AKT-mTOR signaling pathway, are resistant to ferroptosis induction  
471 by the GPX4 inhibitor RSL3 (48). Consistent with this, inhibiting an activated PI3K-AKT-mTOR  
472 signaling pathway sensitizes BCa cells to ferroptosis induction by RSL3 (48). In the current  
473 study, we show that dual targeting of HER2 and GPX4 increases cell death of HER2+/ER+  
474 LTEDs but not levels of ferroptosis lipid peroxidation markers beyond that of single-agent  
475 treatments. One possible explanation could be that GPX4 inhibition may not be sufficient to  
476 overcome ferroptosis resistance in our LTEDs. In other words, elevated GPX4 may not be the  
477 sole cause of ferroptosis resistance in MM361 LTEDs; instead, several other ferroptosis-related  
478 DEGs may mediate this resistance. Dysregulated oxidative and iron homeostasis exemplified by  
479 upregulation of ferroptosis suppressor genes (*TMBIM4* and *GPX4*), antioxidants (*PRDX2*), iron  
480 chelators (*LCN2*), and/or downregulation of ferroptosis inducing genes (*RPL8* and *HILPDA*)  
481 could be responsible for ferroptosis resistance in our LTEDs (**Fig. S3** (28)). Moreover, multiple  
482 ferroptosis regulatory pathways that are independent of GPX4 have recently been discovered  
483 (59). For example, cisplatin-resistant-derived exosomes secrete microRNAs that increase the  
484 expression of ferroptosis suppressor protein 1 (FSP1) and thus enhance resistance of cancer  
485 cells to ferroptosis (60). Along the same lines, LTED cells treated with TP + RSL3 may protect  
486 themselves from ferroptosis using a similar mechanism. In our hands, TP did not reduce GPX4

487 nor enhance expression of ferroptosis lipid peroxidation markers. However, a recent study  
488 reported that trastuzumab triggers ferroptosis by reducing GPX4 whilst increasing ROS levels in  
489 embryonic rat myoblast (H9c2) cells (61). This inconsistency could be attributed to variances in  
490 cell context, doses and/or duration of treatments.

491

492 Inevitably, our study has several limitations that must be considered. Future xenograft studies  
493 will be necessary to verify and follow up on some of our current findings, for example, the  
494 response of ETR HER2+/ER+ to ET and anti-HER2 treatments and whether ferroptosis  
495 induction combined with anti-HER2 treatments suppresses the growth of these cells *in vivo*.  
496 Despite harboring a sufficient gain in *ERBB2* copy number to be classified as HER2+ (amplified,  
497 (62,63)), a previous study demonstrated that the parental MM361 cell line exhibits heterogenous  
498 expression of *ERBB2* and *ESR1*, and this heterogeneity is not due to heritable genetic  
499 differences (63), suggesting a high degree of plasticity and variability. This informed our rationale  
500 for performing scRNAseq to capture transcriptional heterogeneity of the parental cells and ETR  
501 LTED models. Importantly, our conventional and “pseudo-bulk” analyses of the scRNAseq data  
502 both identified alterations in lipid metabolism. However, we sequenced a relatively small number  
503 of cells by scRNAseq (<4000 cells per sample), and combined with the fact that scRNAseq is  
504 best suited to detecting higher abundance transcripts, we cannot exclude the possibility that we  
505 are missing minor populations or subclones that contribute significantly to the ETR phenotype  
506 (e.g. (64,65)). The gene mutations we identified in LTEDs are constrained by the WGS  
507 coverage that we achieved (LTEDA: 53x, LTEDB: 50x, Parental: 52x). Furthermore, deeper  
508 sequencing depths may capture and result in a larger number of mutated genes. However, even  
509 at the sequencing depths and coverage levels we used, our results may suggest that multiple  
510 potential resistance mechanisms exist. Deep sequencing of a different epithelial tumor,  
511 colorectal cancer, coupled with an evolutionary analysis, showed that the  $\sim 10^9$  cells in a 1 cm<sup>3</sup>  
512 lesion will contain every possible resistance mutation in a minor subclone within the lesion (66).

513 This large diversity of resistance mechanisms implies a need for treatment regimens that  
514 include therapies too numerous to be given simultaneously in combination (67).

515

516 Increasing efforts are being directed toward chemotherapy-sparing regimens for HER2+/ER+  
517 BCa (68-71). However, these treatment strategies should also be tested on HER2+/ER+ BCa  
518 that are refractory to or have progressed on ET. Therefore, future studies are needed to  
519 address open questions regarding 1) responsiveness of ETR HER2+/ER+ models to dual and  
520 triple combinations of anti-HER2, ET/SERDs (including recently approved oral SERD  
521 amcenestrant), and CDK4/6 inhibitors, as well as innovative sequencing of these combinations  
522 (63,64,67,72), 2) the impact of our identified mutations on development of ETR in HER2+/ER+  
523 BCa, and 3) differences in ER activity between ETR models of HER2+/ER+ (as BT474) and  
524 other HER2-ER+.

525

## 526 **CONCLUSIONS**

527 Characterizing models of HER2+/ER+ that mimic a real-world treatment pattern is necessary to  
528 understand mechanisms of resistance to ET and may provide useful information for refining  
529 current treatment approaches and improving patients' outcomes. Here, we report that anti-  
530 HER2 targeted therapies effectively inhibit growth of ETR HER2+/ER+ BCa cells that exhibit  
531 concurrent loss of ER expression and gain in HER2 and HER2-E phenotype. Our BT474 and  
532 MM361 AI-resistant models capture distinct phenotypes of HER2+/ER+ BCa and pinpoint  
533 altered lipid metabolism and ferroptosis remodeling as vulnerabilities of this type of ETR BCa.

534

## 535 **ABBREVIATIONS**

536 4-HNE: 4-hydroxynonenal; BCa: Breast cancer; BT474: BT-474; CSS: Charcoal-stripped bovine  
537 serum; DEG: Differential expressed gene; DMFS: Distant metastasis-free survival; E2: 17 $\beta$ -  
538 estradiol; EMT: epithelial-mesenchymal transition; ER: Estrogen receptor; ET: Endocrine

539 therapy; ETR: Endocrine therapy-resistant; FDR: False discovery rate; FSP1: Ferroptosis  
540 suppressor protein 1; GSEA: Gene set enrichment assay; HER2: human epidermal growth  
541 factor receptor 2; HR: Hormone receptor; ICI: fulvestrant; IMEM: Improved minimum essential  
542 medium; LTED: Long-term estrogen deprivation; MDA: Malondialdehyde; MM361: MDA-MB-  
543 361; MSigDB: Molecular signature database; OS: Overall survival; PFS: Progression-free  
544 survival; qRT-PCR: Real-time PCR; RFS: Relapse-free survival; SBS: Single base substitution;  
545 scRNAseq: Single-cell RNA sequencing; SERD: Selective estrogen receptor degrader; TR:  
546 Transcriptional regulator; TP: Trastuzumab + pertuzumab; WGS: whole genome sequencing

547

## 548 **DECLARATIONS**

### 549 ***Acknowledgements***

550 The authors would like to thank members of the Riggins laboratory, Drs. Michael Johnson, Marc  
551 Lippman, and Joyce Slingerland (Lombardi Comprehensive Cancer Center, Georgetown  
552 University), and members of NR IMPACT for sharing reagents, scientific insights, and/or  
553 technical assistance.

554

### 555 ***Data Availability***

556 Original data generated and analyzed during this study are included in this published article or  
557 in the data repository listed in References ((28); <https://doi.org/10.5281/zenodo.8265999>).

558

### 559 ***Authors' contributions***

560 SB, HS and RBR designed the experiments. SB performed most of the experiments, analyzed  
561 data, prepared figures, and drafted the manuscript. HS performed, analyzed, and graphed some  
562 of the RT-PCR and growth assays. MB and MP performed the scRNAseq experiments and LJ  
563 analyzed the scRNAseq and WGS data. ST and DM handled most of the western blot analyses.  
564 MDM and RAB contributed to the study discussions. RBR supervised the study, wrote parts of

565 the manuscript, reviewed, and revised it. All authors read, revised, and approved the final  
566 manuscript.

567

568 ***Ethics approval and consent to participate***

569 Not applicable.

570

571 ***Consent for publication***

572 All authors agreed to publish this study.

573



## 574 REFERENCES

- 575 1. Sung H, Ferlay J, Siegel RL, Laversanne M, Soerjomataram I, Jemal A, Bray F. Global  
576 Cancer Statistics 2020: GLOBOCAN Estimates of Incidence and Mortality Worldwide for  
577 36 Cancers in 185 Countries. *CA Cancer J Clin.* 2021;71(3):209-249.
- 578 2. Alataki A, Dowsett M. Human epidermal growth factor receptor-2 and endocrine  
579 resistance in hormone-dependent breast cancer. *Endocr Relat Cancer.*  
580 2022;29(8):R105-R122.
- 581 3. Azim HA, Jr., Piccart MJ. Simultaneous targeting of estrogen receptor and HER2 in  
582 breast cancer. *Expert Rev Anticancer Ther.* 2010;10(8):1255-1263.
- 583 4. Vaz-Luis I, Winer EP, Lin NU. Human epidermal growth factor receptor-2-positive breast  
584 cancer: does estrogen receptor status define two distinct subtypes? *Ann Oncol.*  
585 2013;24(2):283-291.
- 586 5. Park YH, Lee S, Cho EY, Choi YL, Lee JE, Nam SJ, Yang JH, Ahn JS, Im YH. Patterns  
587 of relapse and metastatic spread in HER2-overexpressing breast cancer according to  
588 estrogen receptor status. *Cancer Chemother Pharmacol.* 2010;66(3):507-516.
- 589 6. Vaz-Luis I, Ottesen RA, Hughes ME, Marcom PK, Moy B, Rugo HS, Theriault RL,  
590 Wilson J, Niland JC, Weeks JC, Lin NU. Impact of hormone receptor status on patterns  
591 of recurrence and clinical outcomes among patients with human epidermal growth  
592 factor-2-positive breast cancer in the National Comprehensive Cancer Network: a  
593 prospective cohort study. *Breast Cancer Res.* 2012;14(5):1-14.
- 594 7. Arciero CA, Guo Y, Jiang R, Behera M, O'Regan R, Peng L, Li X. ER+/HER2+ Breast  
595 Cancer Has Different Metastatic Patterns and Better Survival Than ER-/HER2+ Breast  
596 Cancer. *Clin Breast Cancer.* 2019;19(4):236-245.
- 597 8. Han Y, Wu Y, Xu H, Wang J, Xu B. The impact of hormone receptor on the clinical  
598 outcomes of HER2-positive breast cancer: a population-based study. *Int J Clin Oncol.*  
599 2022;27(4):707-716.
- 600 9. Martinez-Saez O, Prat A. Current and Future Management of HER2-Positive Metastatic  
601 Breast Cancer. *JCO Oncol Pract.* 2021;17(10):594-604.
- 602 10. Bergamino MA, López-Knowles E, Morani G, Tovey H, Kilburn L, Schuster EF, Alataki A,  
603 Hills M, Xiao H, Holcombe C, Skene A, Robertson JF, Smith IE, Bliss JM, Dowsett M,  
604 Cheang MCU. HER2-enriched subtype and novel molecular subgroups drive aromatase  
605 inhibitor resistance and an increased risk of relapse in early ER+/HER2+ breast cancer.  
606 *EBioMedicine.* 2022;83:104205.
- 607 11. Ellis MJ, Tao Y, Young O, White S, Proia AD, Murray J, Renshaw L, Faratian D, Thomas  
608 J, Dowsett M, Krause A, Evans DB, Miller WR, Dixon JM. Estrogen-Independent  
609 Proliferation Is Present in Estrogen-Receptor HER2-Positive Primary Breast Cancer  
610 After Neoadjuvant Letrozole. *Journal of Clinical Oncology.* 2006;24(19):3019-3025.
- 611 12. Kaufman B, Mackey JR, Clemens MR, Bapsy PP, Vaid A, Wardley A, Tjulandin S, Jahn  
612 M, Lehle M, Feyereislova A, Révil C, Jones A. Trastuzumab plus anastrozole versus  
613 anastrozole alone for the treatment of postmenopausal women with human epidermal  
614 growth factor receptor 2-positive, hormone receptor-positive metastatic breast cancer:  
615 results from the randomized phase III TAnDEM study. *J Clin Oncol.* 2009;27(33):5529-  
616 5537.
- 617 13. Huober J, Fasching PA, Barsoum M, Petruzella L, Wallwiener D, Thomssen C, Reimer  
618 T, Paepke S, Azim HA, Ragosch V, Kubista E, Baumgärtner AK, Beckmann MW, May C,  
619 Nimmrich I, Harbeck N. Higher efficacy of letrozole in combination with trastuzumab  
620 compared to letrozole monotherapy as first-line treatment in patients with HER2-positive,  
621 hormone-receptor-positive metastatic breast cancer - results of the eLEcTRA trial.  
622 *Breast.* 2012;21(1):27-33.

- 623 14. Rimawi M, Ferrero JM, de la Haba-Rodriguez J, Poole C, De Placido S, Osborne CK,  
624 Hegg R, Easton V, Wohlfarth C, Arpino G. First-Line Trastuzumab Plus an Aromatase  
625 Inhibitor, With or Without Pertuzumab, in Human Epidermal Growth Factor Receptor 2-  
626 Positive and Hormone Receptor-Positive Metastatic or Locally Advanced Breast Cancer  
627 (PERTAIN): A Randomized, Open-Label Phase II Trial. *J Clin Oncol*. 2018;36(28):2826-  
628 2835.
- 629 15. Statler AB, Hobbs BP, Wei W, Gupta A, Blake CN, Nahleh ZA. Real-world Treatment  
630 Patterns and Outcomes in HR+/HER2+ Metastatic Breast Cancer Patients: A National  
631 Cancer Database Analysis. *Sci Rep*. 2019;9(1):1-10.
- 632 16. Ibragimova KIE, Geurts SME, Meegdes M, Erdkamp F, Heijns JB, Tol J, Vriens B,  
633 Dercksen MW, Aaldering KNA, Pepels M, van de Winkel L, Peters N, Teeuwen-Dedroog  
634 NJA, Vriens IJH, Tjan-Heijnen VCG. Outcomes for the first four lines of therapy in  
635 patients with HER2-positive advanced breast cancer: results from the SONABRE  
636 registry. *Breast Cancer Res Treat*. 2023:1-13.
- 637 17. Cardoso F, Paluch-Shimon S, Senkus E, Curigliano G, Aapro MS, Andre F, Barrios CH,  
638 Bergh J, Bhattacharyya GS, Biganzoli L, Boyle F, Cardoso MJ, Carey LA, Cortes J, El  
639 Saghier NS, Elzayat M, Eniu A, Fallowfield L, Francis PA, Gelmon K, Gligorov J,  
640 Haidinger R, Harbeck N, Hu X, Kaufman B, Kaur R, Kiely BE, Kim SB, Lin NU, Mertz  
641 SA, Neciosup S, Offersen BV, Ohno S, Pagani O, Prat A, Penault-Llorca F, Rugo HS,  
642 Sledge GW, Thomssen C, Vorobiof DA, Wiseman T, Xu B, Norton L, Costa A, Winer EP.  
643 5th ESO-ESMO international consensus guidelines for advanced breast cancer (ABC 5).  
644 *Ann Oncol*. 2020;31(12):1623-1649.
- 645 18. Giordano SH, Franzoi MAB, Temin S, Anders CK, Chandralapaty S, Crews JR, Kirshner  
646 JJ, Krop IE, Lin NU, Morikawa A, Patt DA, Perlmutter J, Ramakrishna N, Davidson NE.  
647 Systemic Therapy for Advanced Human Epidermal Growth Factor Receptor 2-Positive  
648 Breast Cancer: ASCO Guideline Update. *J Clin Oncol*. 2022;40(23):2612-2635.
- 649 19. Dowsett M, Allred C, Knox J, Quinn E, Salter J, Wale C, Cuzick J, Houghton J, Williams  
650 N, Mallon E, Bishop H, Ellis I, Larsimont D, Sasano H, Carder P, Cussac AL, Knox F,  
651 Speirs V, Forbes J, Buzdar A. Relationship between quantitative estrogen and  
652 progesterone receptor expression and human epidermal growth factor receptor 2 (HER-  
653 2) status with recurrence in the Arimidex, Tamoxifen, Alone or in Combination trial. *J Clin  
654 Oncol*. 2008;26(7):1059-1065.
- 655 20. Cortes J, Baselga J. How to treat hormone receptor-positive, human epidermal growth  
656 factor receptor 2-amplified breast cancer. *J Clin Oncol*. 2009;27(33):5492-5494.
- 657 21. Schiff R, Massarweh SA, Shou J, Bharwani L, Mohsin SK, Osborne CK. Cross-talk  
658 between estrogen receptor and growth factor pathways as a molecular target for  
659 overcoming endocrine resistance. *Clin Cancer Res*. 2004;10(1 Pt 2):331s-336s.
- 660 22. Dowsett M, Ebbs SR, Dixon JM, Skene A, Griffith C, Boeddinghaus I, Salter J, Detre S,  
661 Hills M, Ashley S, Francis S, Walsh G, Smith IE. Biomarker changes during neoadjuvant  
662 anastrozole, tamoxifen, or the combination: influence of hormonal status and HER-2 in  
663 breast cancer--a study from the IMPACT trialists. *J Clin Oncol*. 2005;23(11):2477-2492.
- 664 23. Bender LM, Nahta R. Her2 cross talk and therapeutic resistance in breast cancer. *Front  
665 Biosci*. 2008;13:3906-3912.
- 666 24. Chung YL, Sheu ML, Yang SC, Lin CH, Yen SH. Resistance to tamoxifen-induced  
667 apoptosis is associated with direct interaction between Her2/neu and cell membrane  
668 estrogen receptor in breast cancer. *Int J Cancer*. 2002;97(3):306-312.
- 669 25. Shou J, Massarweh S, Osborne CK, Wakeling AE, Ali S, Weiss H, Schiff R. Mechanisms  
670 of tamoxifen resistance: increased estrogen receptor-HER2/neu cross-talk in ER/HER2-  
671 positive breast cancer. *J Natl Cancer Inst*. 2004;96(12):926-935.
- 672 26. Neve RM, Chin K, Fridlyand J, Yeh J, Baehner FL, Fevr T, Clark L, Bayani N, Coppe JP,  
673 Tong F, Speed T, Spellman PT, DeVries S, Lapuk A, Wang NJ, Kuo WL, Stilwell JL,

- 674 Pinkel D, Albertson DG, Waldman FM, McCormick F, Dickson RB, Johnson MD,  
675 Lippman M, Ethier S, Gazdar A, Gray JW. A collection of breast cancer cell lines for the  
676 study of functionally distinct cancer subtypes. *Cancer Cell*. 2006;10(6):515-527.
- 677 27. Dai X, Cheng H, Bai Z, Li J. Breast Cancer Cell Line Classification and Its Relevance  
678 with Breast Tumor Subtyping. *J Cancer*. 2017;8(16):3131-3141.
- 679 28. Bahnassy S, Stires H, Jin L, Tam S, Mobin D, Balachandran M, Podar M, McCoy MD,  
680 Beckman RA, Riggins RB. Data from: Data from: Unraveling vulnerabilities in endocrine  
681 therapy-resistant HER2+/ER+ breast cancer 2023. Deposited Deposited 19 August  
682 2023. <https://zenodo.org/record/8266000>.
- 683 29. Macosko EZ, Basu A, Satija R, Nemesh J, Shekhar K, Goldman M, Tirosh I, Bialas AR,  
684 Kamitaki N, Martersteck EM, Trombetta JJ, Weitz DA, Sanes JR, Shalek AK, Regev A,  
685 McCarroll SA. Highly Parallel Genome-wide Expression Profiling of Individual Cells  
686 Using Nanoliter Droplets. *Cell*. 2015;161(5):1202-1214.
- 687 30. Hao Y, Hao S, Andersen-Nissen E, Mauck WM, 3rd, Zheng S, Butler A, Lee MJ, Wilk  
688 AJ, Darby C, Zager M, Hoffman P, Stoeckius M, Papalexi E, Mimitou EP, Jain J,  
689 Srivastava A, Stuart T, Fleming LM, Yeung B, Rogers AJ, McElrath JM, Blish CA,  
690 Gottardo R, Smibert P, Satija R. Integrated analysis of multimodal single-cell data. *Cell*.  
691 2021;184(13):3573-3587 e3529.
- 692 31. Gendoo DM, Ratanasirigulchai N, Schroder MS, Pare L, Parker JS, Prat A, Haibe-Kains  
693 B. Genefu: an R/Bioconductor package for computation of gene expression-based  
694 signatures in breast cancer. *Bioinformatics*. 2016;32(7):1097-1099.
- 695 32. Subramanian A, Tamayo P, Mootha VK, Mukherjee S, Ebert BL, Gillette MA, Paulovich  
696 A, Pomeroy SL, Golub TR, Lander ES, Mesirov JP. Gene set enrichment analysis: a  
697 knowledge-based approach for interpreting genome-wide expression profiles. *Proc Natl  
698 Acad Sci U S A*. 2005;102(43):15545-15550.
- 699 33. Andrews S. FastQC: a quality control tool for high throughput sequence data. Babraham  
700 Bioinformatics, Babraham Institute, Cambridge, United Kingdom; 2010.
- 701 34. Martin M. Cutadapt removes adapter sequences from high-throughput sequencing  
702 reads. *2011*. 2011;17(1):3.
- 703 35. Li H, Durbin R. Fast and accurate short read alignment with Burrows-Wheeler transform.  
704 *Bioinformatics*. 2009;25(14):1754-1760.
- 705 36. Van der Auwera GA, O'Connor BD. Genomics in the cloud: using Docker, GATK, and  
706 WDL in Terra. O'Reilly Media.
- 707 37. Alexandrov LB, Kim J, Haradhvala NJ, Huang MN, Tian Ng AW, Wu Y, Boot A,  
708 Covington KR, Gordenin DA, Bergstrom EN, Islam SMA, Lopez-Bigas N, Klimczak LJ,  
709 McPherson JR, Morganella S, Sabarinathan R, Wheeler DA, Mustonen V, Group  
710 PMSW, Getz G, Rozen SG, Stratton MR, Consortium P. The repertoire of mutational  
711 signatures in human cancer. *Nature*. 2020;578(7793):94-101.
- 712 38. Gyorfy B, Lanczky A, Eklund AC, Denkert C, Budczies J, Li Q, Szallasi Z. An online  
713 survival analysis tool to rapidly assess the effect of 22,277 genes on breast cancer  
714 prognosis using microarray data of 1,809 patients. *Breast Cancer Res Treat*.  
715 2010;123(3):725-731.
- 716 39. Cailleau R, Olive M, Cruciger QV. Long-term human breast carcinoma cell lines of  
717 metastatic origin: preliminary characterization. *In Vitro*. 1978;14(11):911-915.
- 718 40. Bai X, Sun P, Wang X, Long C, Liao S, Dang S, Zhuang S, Du Y, Zhang X, Li N, He K,  
719 Zhang Z. Structure and dynamics of the EGFR/HER2 heterodimer. *Cell Discov*.  
720 2023;9(1):18.
- 721 41. Meegdes M, Ibragimova KIE, Lobbezoo DJA, Vriens IJH, Kooreman LFS, Erdkamp FLG,  
722 Dercksen MW, Vriens B, Aaldering KNA, Pepels M, van de Winkel LMH, Tol J, Heijns  
723 JB, van de Wouw AJ, Peters N, Hochstenbach-Waelen A, Smidt ML, Geurts SME, Tjan-  
724 Heijnen VCG. The initial hormone receptor/HER2 subtype is the main determinant of

- 725 subtype discordance in advanced breast cancer: a study of the SONABRE registry.  
726 *Breast Cancer Res Treat.* 2022;192(2):331-342.
- 727 42. Martinez-Jimenez F, Movasati A, Brunner SR, Nguyen L, Priestley P, Cuppen E, Van  
728 Hoeck A. Pan-cancer whole-genome comparison of primary and metastatic solid  
729 tumours. *Nature.* 2023;618(7964):333-341.
- 730 43. Stephenson JD, Laskowski RA, Nightingale A, Hurlles ME, Thornton JM. VarMap: a web  
731 tool for mapping genomic coordinates to protein sequence and structure and retrieving  
732 protein structural annotations. *Bioinformatics.* 2019;35(22):4854-4856.
- 733 44. Qin Q, Fan J, Zheng R, Wan C, Mei S, Wu Q, Sun H, Brown M, Zhang J, Meyer CA, Liu  
734 XS. Lisa: inferring transcriptional regulators through integrative modeling of public  
735 chromatin accessibility and ChIP-seq data. *Genome Biol.* 2020;21(1):32.
- 736 45. Lefterova MI, Zhang Y, Steger DJ, Schupp M, Schug J, Cristancho A, Feng D, Zhuo D,  
737 Stoeckert CJ, Jr., Liu XS, Lazar MA. PPARgamma and C/EBP factors orchestrate  
738 adipocyte biology via adjacent binding on a genome-wide scale. *Genes Dev.*  
739 2008;22(21):2941-2952.
- 740 46. Yan HF, Zou T, Tuo QZ, Xu S, Li H, Belaidi AA, Lei P. Ferroptosis: mechanisms and  
741 links with diseases. *Signal Transduct Target Ther.* 2021;6(1):49.
- 742 47. Cai Y, Yang Z. Ferroptosis and Its Role in Epilepsy. *Front Cell Neurosci.*  
743 2021;15:696889.
- 744 48. Yi J, Zhu J, Wu J, Thompson CB, Jiang X. Oncogenic activation of PI3K-AKT-mTOR  
745 signaling suppresses ferroptosis via SREBP-mediated lipogenesis. *Proc Natl Acad Sci U*  
746 *S A.* 2020;117(49):31189-31197.
- 747 49. Cejalvo JM, Pascual T, Fernández-Martínez A, Brasó-Maristany F, Gomis RR, Perou  
748 CM, Muñoz M, Prat A. Clinical implications of the non-luminal intrinsic subtypes in  
749 hormone receptor-positive breast cancer. *Cancer Treat Rev.* 2018;67:63-70.
- 750 50. Prat A, Carey LA, Adamo B, Vidal M, Tabernero J, Cortés J, Parker JS, Perou CM,  
751 Baselga J. Molecular features and survival outcomes of the intrinsic subtypes within  
752 HER2-positive breast cancer. *J Natl Cancer Inst.* 2014;106(8):1-8.
- 753 51. Pinhel I, Hills M, Drury S, Salter J, Sumo G, A'Hern R, Bliss JM, Sestak I, Cuzick J,  
754 Barrett-Lee P, Harris A, Dowsett M, Group NABCTM. ER and HER2 expression are  
755 positively correlated in HER2 non-overexpressing breast cancer. *Breast Cancer Res.*  
756 2012;14(2):1-12.
- 757 52. Ding Y, Liu Y, Lee DK, Tong Z, Yu X, Li Y, Xu Y, Lanz RB, O'Malley BW, Xu J. Cell  
758 lineage tracing links ER $\alpha$  loss in Erbb2-positive breast cancers to the arising of a highly  
759 aggressive breast cancer subtype. *Proc Natl Acad Sci U S A.*  
760 2021;118(21):e2100673118.
- 761 53. Knowlden JM, Hutcheson IR, Jones HE, Madden T, Gee JM, Harper ME, Barrow D,  
762 Wakeling AE, Nicholson RI. Elevated levels of epidermal growth factor receptor/c-erbB2  
763 heterodimers mediate an autocrine growth regulatory pathway in tamoxifen-resistant  
764 MCF-7 cells. *Endocrinology.* 2003;144(3):1032-1044.
- 765 54. Bailey ST, Westerling T, Brown M. Loss of Estrogen-Regulated microRNA Expression  
766 Increases HER2 Signaling and Is Prognostic of Poor Outcome in Luminal Breast  
767 Cancer. *Cancer Research.* 2015;75(2):436-445.
- 768 55. Xia Y, He X, Renshaw L, Martinez-Perez C, Kay C, Gray M, Meehan J, Parker JS,  
769 Perou CM, Carey LA, Dixon JM, Turnbull A. Integrated DNA and RNA Sequencing  
770 Reveals Drivers of Endocrine Resistance in Estrogen Receptor-Positive Breast Cancer.  
771 *Clin Cancer Res.* 2022;28(16):3618-3629.
- 772 56. Bedi U, Scheel AH, Hennion M, Begus-Nahrman Y, Ruschoff J, Johnsen SA. SUPT6H  
773 controls estrogen receptor activity and cellular differentiation by multiple epigenomic  
774 mechanisms. *Oncogene.* 2015;34(4):465-473.

- 775 57. Yu W, Ma Y, Ochoa AC, Shankar S, Srivastava RK. Cellular transformation of human  
776 mammary epithelial cells by SATB2. *Stem Cell Res.* 2017;19:139-147.
- 777 58. Kataoka Y, Mukohara T, Shimada H, Saijo N, Hirai M, Minami H. Association between  
778 gain-of-function mutations in PIK3CA and resistance to HER2-targeted agents in HER2-  
779 amplified breast cancer cell lines. *Ann Oncol.* 2010;21(2):255-262.
- 780 59. Ma T, Du J, Zhang Y, Wang Y, Wang B, Zhang T. GPX4-independent ferroptosis-a new  
781 strategy in disease's therapy. *Cell Death Discov.* 2022;8(1):434.
- 782 60. Song Z, Jia G, Ma P, Cang S. Exosomal miR-4443 promotes cisplatin resistance in non-  
783 small cell lung carcinoma by regulating FSP1 m6A modification-mediated ferroptosis.  
784 *Life Sci.* 2021;276:119399.
- 785 61. Sun L, Wang H, Yu S, Zhang L, Jiang J, Zhou Q. Herceptin induces ferroptosis and  
786 mitochondrial dysfunction in H9c2 cells. *Int J Mol Med.* 2022;49(2):1-8.
- 787 62. Ghandi M, Huang FW, Jane-Valbuena J, Kryukov GV, Lo CC, McDonald ER, 3rd,  
788 Barretina J, Gelfand ET, Bielski CM, Li H, Hu K, Andreev-Drakhlin AY, Kim J, Hess JM,  
789 Haas BJ, Aguet F, Weir BA, Rothberg MV, Paolella BR, Lawrence MS, Akbani R, Lu Y,  
790 Tiv HL, Gokhale PC, de Weck A, Mansour AA, Oh C, Shih J, Hadi K, Rosen Y, Bistline  
791 J, Venkatesan K, Reddy A, Sonkin D, Liu M, Lehar J, Korn JM, Porter DA, Jones MD,  
792 Golji J, Caponigro G, Taylor JE, Dunning CM, Creech AL, Warren AC, McFarland JM,  
793 Zamanighomi M, Kauffmann A, Stransky N, Imielinski M, Maruvka YE, Cherniack AD,  
794 Tsherniak A, Vazquez F, Jaffe JD, Lane AA, Weinstock DM, Johannessen CM,  
795 Morrissey MP, Stegmeier F, Schlegel R, Hahn WC, Getz G, Mills GB, Boehm JS, Golub  
796 TR, Garraway LA, Sellers WR. Next-generation characterization of the Cancer Cell Line  
797 Encyclopedia. *Nature.* 2019;569(7757):503-508.
- 798 63. Gambardella G, Viscido G, Tumaini B, Isacchi A, Bosotti R, di Bernardo D. A single-cell  
799 analysis of breast cancer cell lines to study tumour heterogeneity and drug response.  
800 *Nat Commun.* 2022;13(1):1714.
- 801 64. Beckman RA, Schemmann GS, Yeang CH. Impact of genetic dynamics and single-cell  
802 heterogeneity on development of nonstandard personalized medicine strategies for  
803 cancer. *Proc Natl Acad Sci U S A.* 2012;109(36):14586-14591.
- 804 65. Yeang CH, Beckman RA. Long range personalized cancer treatment strategies  
805 incorporating evolutionary dynamics. *Biol Direct.* 2016;11(1):56.
- 806 66. Loeb LA, Kohn BF, Loubet-Seneor KJ, Dunn YJ, Ahn EH, O'Sullivan JN, Salk JJ,  
807 Bronner MP, Beckman RA. Extensive subclonal mutational diversity in human colorectal  
808 cancer and its significance. *Proc Natl Acad Sci U S A.* 2019;116(52):26863-26872.
- 809 67. Beckman RA, Loeb LA. Rare Mutations in Cancer Drug Resistance and Implications for  
810 Therapy. *Clin Pharmacol Ther.* 2020;108(3):437-439.
- 811 68. Ademuyiwa FO, Northfelt DW, O'Connor T, Levine E, Luo J, Tao Y, Hoog J, Laury ML,  
812 Summa T, Hammerschmidt T, Guo Z, Frith A, Weilbaecher K, Opyrchal M, Aft R, Clifton  
813 K, Suresh R, Bagegni N, Hagemann IS, Iglesia MD, Ma CX. A phase II study of  
814 palbociclib plus letrozole plus trastuzumab as neoadjuvant treatment for clinical stages II  
815 and III ER+ HER2+ breast cancer (PALTAN). *npj Breast Cancer.* 2023;9(1):1.
- 816 69. Ciruelos E, Villagrasa P, Pascual T, Oliveira M, Pernas S, Pare L, Escriva-de-Romani S,  
817 Manso L, Adamo B, Martinez E, Cortes J, Vazquez S, Perello A, Garau I, Mele M,  
818 Martinez N, Montano A, Bermejo B, Morales S, Echarri MJ, Vega E, Gonzalez-Farre B,  
819 Martinez D, Galvan P, Canes J, Nuciforo P, Gonzalez X, Prat A. Palbociclib and  
820 Trastuzumab in HER2-Positive Advanced Breast Cancer: Results from the Phase II  
821 SOLTI-1303 PATRICIA Trial. *Clin Cancer Res.* 2020;26(22):5820-5829.
- 822 70. Mahdi AF, Ashfield N, Conlon NT, Crown J, Collins DM. Abstract P3-07-16: Pre-clinical  
823 study of amcenestrant and HER2-targeted therapies in HER2+/ER+ breast cancer cell  
824 line models. *Cancer Research.* 2023;83(5\_Supplement):P3-07.

- 825 71. Shagisultanova E, Crump LS, Borakove M, Hall JK, Rasti AR, Harrison BA, Kabos P,  
826 Lyons TR, Borges VF. Triple Targeting of Breast Tumors Driven by Hormonal Receptors  
827 and HER2. *Mol Cancer Ther.* 2022;21(1):48-57.
- 828 72. Madhavan S, Beckman RA, McCoy MD, Pishvaian MJ, Brody JR, Macklin P. Envisioning  
829 the future of precision oncology trials. *Nat Cancer.* 2021;2(1):9-11.

830

831 **ADDITIONAL FILES**

832 **Additional file 1:** Supplemental materials and methods. **Table S1.** List of primer sequences  
833 used for the detection of transcripts. Supplemental figures and figure legends: **Figure S1.**  
834 Effects of HER2- and ER-targeted therapies on ER expression and phosphorylation of HER2 in  
835 HER2+/ER+ LTEDs. **Figure S2.** Breast tumors harboring mutated genes identified in MM361  
836 LTED cells are associated with HER2+ status and lower PR expression. **Figure S3.** Cluster  
837 analysis of MM361 parental and LTED cell scRNAseq data. **Figure S4.** scRNAseq expression  
838 of *ESR1* and *ERBB2* in MM361 parental and LTED cells. **Figure S5.** Ferroptosis-related genes  
839 in MM361 LTEDs. **Figure S6.** Dual targeting of HER2 and GPX4 increase cell death of BT474  
840 LTEDs. **Figure S7.** Effects of TP and RSL3 on protein expression of ferroptosis lipid  
841 peroxidation markers (4-HNE and MDA).

842 **Additional file 2: Table S2.** Shared genes bearing exonic mutations in MM361 LTEDA and B  
843 versus parental cells and predicted pathogenicity.

844 **Additional file 3: Table S3.** Differentially expressed genes that are shared in the LTEDA and  
845 LTEDB variants of the MM361 cell line, and inference of transcriptional regulators using LISA  
846 (<http://lisa.cistrome.org/>, accessed on 4 May 2023).

847

848 **FIGURE LEGENDS**

849 **Figure 1. Survival analysis for HER2+ BCa regarding their ER status. (A)** Compared to  
850 early-stage disease, five-year survival rates from the SEER database  
851 (<https://seer.cancer.gov/statistics-network/explorer>, accessed on 6 February 2023) are lowest  
852 for patients with late (distant)-stage HER2+ BCa subtype, regardless of their ER status. Error  
853 bars represent SEM. One-way ANOVA followed by Tukey's multiple comparison was performed  
854 to compare between groups; \*\*\* $p < 0.001$  denotes statistically significant. **(B-D)** Patients of  
855 the HER2+ BCa subtype expressing high levels of *ESR1* have a significantly lower probability  
856 for metastasis. Ten-year survival curves for HER2+ BCa patients stratified by high and low gene

857 expression of *ESR1* (205225\_at). Plots were generated from KM Plotter database for BCa  
858 ([www.kmplot.com](http://www.kmplot.com), accessed on 2 February 2023) and show hazard ratio (HR) at 95%  
859 confidence, log-rank P values and number of patients (n). OS: Overall survival; RFS: Relapse-  
860 free survival; DMFS: Distant metastasis-free survival.

861

862 **Figure 2. Growth pattern and response to ER- and HER2-targeted therapies of**  
863 **HER2+/ER+ LTED variants differ from their parental counterparts. (A)** Western blot  
864 validation that BT474 and MM361 express HER2 and ER. **(B)** Schematic illustrates our  
865 preclinical modeling of ER-targeted therapy resistance by establishing two LTED variants (A  
866 and B) for each of the BT474 and MM361 cell lines. **(C)** Growth curves for parental (BT474 and  
867 MM361) and their LTED-derived (A and B) variants. Parental cells were cultured in either  
868 normal growth media (IMEM supplemented with 10% FBS) or hormone-deprived media (phenol-  
869 red free IMEM supplemented with 10% CSS). Parental cells of the CSS group were hormone-  
870 deprived for 72 h before seeding. Plots represent mean  $\pm$  SEM from two independent  
871 experiments, each performed in triplicates and asterisks denote significant changes using one-  
872 way ANOVA followed by Dunnett's multiple comparison test. **(D)** Parental MM361 is intrinsically  
873 resistant to TP treatments whereas both MM361 and BT474 LTED models are less responsive  
874 to ICI. Crystal violet growth assay after six days of treatments with either vehicle, 10 nM E2 + 1  
875  $\mu$ M ICI or 1  $\mu$ g/ml T + 1  $\mu$ g/ml P. Representative graph with data presented as mean  $\pm$  SEM  
876 from three independent experiments with six readings and analyzed by ANOVA using Dunnett's  
877 multiple comparison test. \* $p < 0.05$ , \*\* $p < 0.01$  and \*\*\* $p < 0.001$  were considered  
878 statistically significant.

879

880 **Figure 3. Expression and genomic activity of ER is either preserved or lost in our**  
881 **HER2+/ER+ LTED models. (A)** Western blot analysis show that ER protein is drastically  
882 reduced in the MM361 LTED models but preserved in the BT474 LTEDs. **(B)** Blots from (A)



883 were analyzed by densitometry using ImageJ. Protein expressions were normalized to GAPDH  
884 and graphed as mean  $\pm$  SEM from at least two independent experiments. ANOVA followed by  
885 Dunnett's multiple comparison test was performed to compare groups and statistical  
886 significance is shown on the graph. **(C-D)** Expression of *ESR1* and ER-target genes (*PGR* and  
887 *TFF1*) are maintained in BT474 LTEDs but drastically reduced in MM361 LTEDs. mRNA levels  
888 of ER and selected ER-target genes under basal conditions or after estrogen stimulation (with  
889 either 1 nM or 10 nM E2 for 72 h) were analyzed by qRT-PCR and data represented as mean  $\pm$   
890 SEM of fold changes in transcript expression from four independent experiments. Asterisks  
891 denote significant changes using ANOVA followed by Dunnett's multiple comparison test.  
892 \* $p < 0.05$ , \*\* $p < 0.01$  and \*\*\* $p < 0.001$  were considered statistically significant.

893

894 **Figure 4. MM361 LTEDs gain basal-like, HER2-E intrinsic subtypes and harbor mutations**  
895 **in transcriptional and chromatin regulatory factors. (A)** UMAP plot of scRNAseq data  
896 grouped by predefined PAM50 intrinsic molecular subtypes. **(B)** Bar graph quantifies the  
897 distribution of intrinsic subtypes. **(C-F)** Characterizing MM361 LTED mutations using WGS. **(C)**  
898 Single base substitution (SBS) mutational signatures for the entire genome of MM361 LTEDs.  
899 **(D)** Venn diagram intersection showing shared mutated genes at their exonic regions of MM361  
900 LTEDA and B versus parental cells. **(E)** Quantifying SBS for non-silent mutated genes at exonic  
901 regions. **(F)** Mutational effect predictions using Varmap ([https://www.ebi.ac.uk/thornton-](https://www.ebi.ac.uk/thornton-srv/databases/VarMap)  
902 [srv/databases/VarMap](https://www.ebi.ac.uk/thornton-srv/databases/VarMap), accessed on 11 August 2022).

903

904 **Figure 5. Lipid metabolism pathways are upregulated in LTEDs of the MM361 cell line. (A)**  
905 Transcriptional profiling from scRNAseq at FDR<0.05 and log2 fold change  $\leq -0.5$  and  $\geq 0.5$   
906 identified 356 DEG between parental and LTEDA and 674 DEG between parental and LTEDB.  
907 **(B)** A total of 202 DEG are shared in both LTED lines vs. parental cells. Venn diagram  
908 intersections show 156 shared upregulated and 46 shared downregulated DEG in the MM361

909 LTEDs vs. parental. **(C)** qRT-PCR was used to confirm increased expression of selected  
910 upregulated genes identified from the scRNAseq transcriptomic profiling. Data presented as  
911 mean  $\pm$  SEM of fold changes in expression of each gene (LTEDs relative to parental cells) from  
912 three independent experiments. Asterisks denote significant changes using ANOVA followed by  
913 Dunnett's multiple comparison test. **(D)** Top 20 enriched biological processes in MM361 LTEDs.  
914 Overlapped up- and down-regulated DEGs (from B) in MM361 LTEDs were analyzed by GSEA  
915 using the REACTOME gene set, with FDR q-values  $<0.05$ . Red- and blue-filled boxes highlight  
916 metabolic pathways. **(E)** UMAP plots for *ALOX15B* and *GPX4*, among the upregulated genes of  
917 the lipid metabolism pathway being enriched in the MM361 LTEDs.

918

919 **Figure 6. Dual targeting of HER2 and GPX4 increase cell death of MM361 LTEDs. (A)**

920 Representative immunoblot of three independent experiments showing enhanced expression of  
921 GPX4 protein in MM361 LTEDs. **(B-D)** Cells treated with either vehicle, 1  $\mu\text{g/ml}$  T + 1  $\mu\text{g/ml}$  P,  
922 1  $\mu\text{M}$  RSL3 or a combination of both for 72 h then stained with Hoechst to monitor total cell  
923 number (blue nuclei), and Sytox green to monitor dead cells (green nuclei) as in panels B and C  
924 or analyzed by western blot analysis as in D. **(B-C)** Sytox staining experiments show that  
925 cotreatments of TP + RSL3 induce the highest cell death in MM361 LTEDs. **(B)** Cell death  
926 representative images and **(C)** quantifications from two independent experiments with at least  
927 ten fields analyzed for each and data presented as mean  $\pm$  SEM of cell death percentages.  
928 Asterisks denote significant changes using one-way ANOVA followed by Tukey's multiple  
929 comparison test; \* $p < 0.05$  and \*\*\* $p < 0.001$  were considered statistically significant. **(D)**  
930 Treatment effects on GPX4 and pAKT protein levels were assessed with western blot analysis.  
931 Immunoblots are a representation of two independent experiments.

# **Unraveling Vulnerabilities in Endocrine Therapy-Resistant HER2+/ER+ Breast Cancer**

**A**

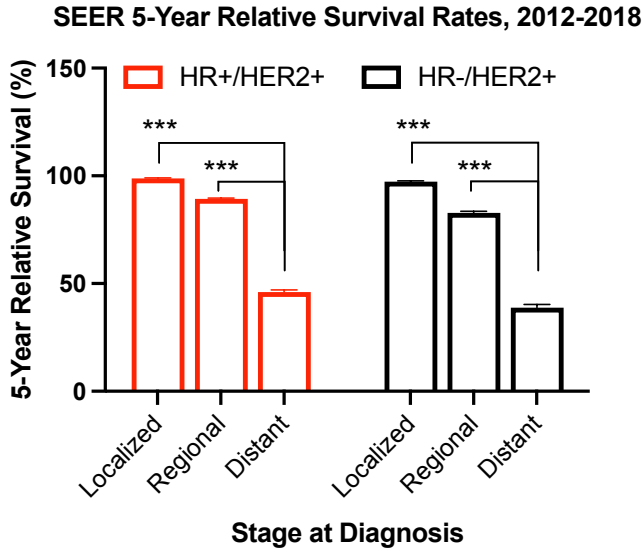

**B**

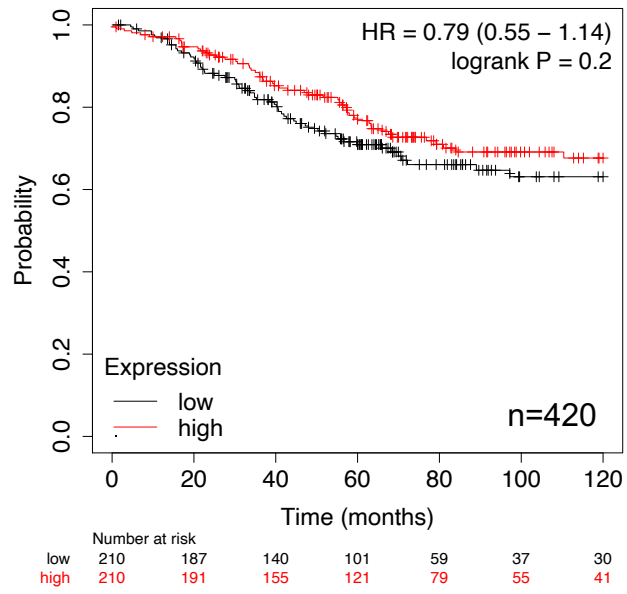

**C**

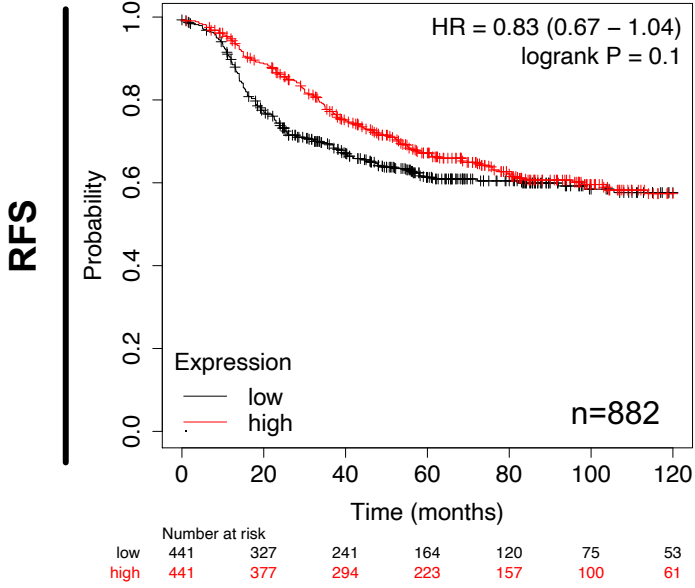

**D**

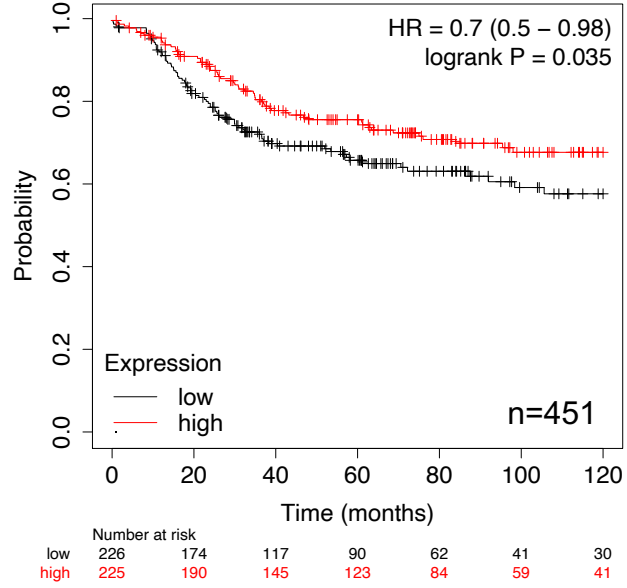

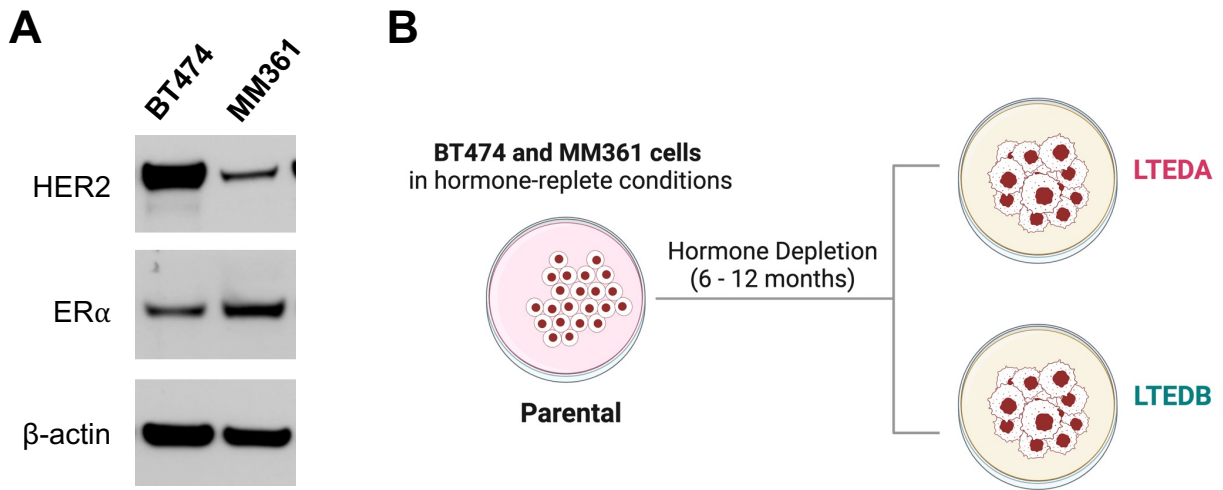

**C**

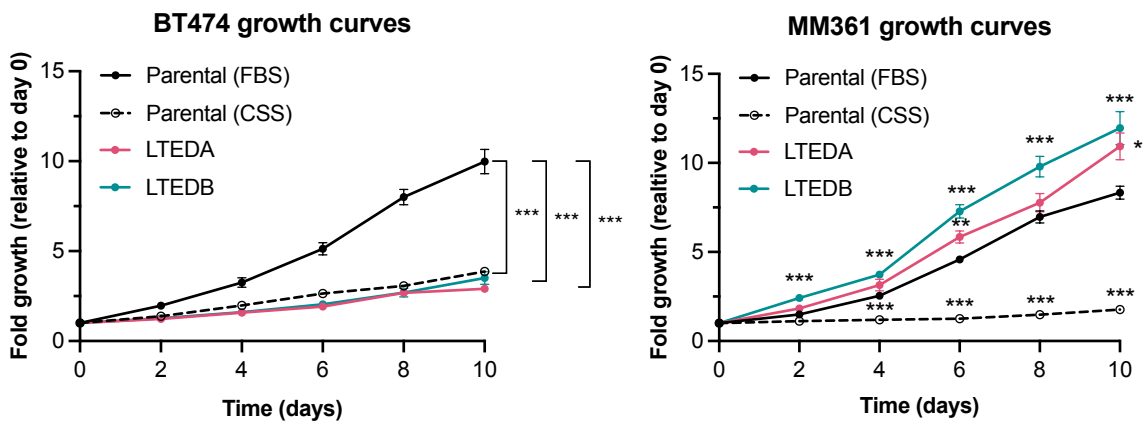

**D**

Response to Fulvestrant (ICI) and Trastuzumab (T) + Pertuzumab (P) Treatments

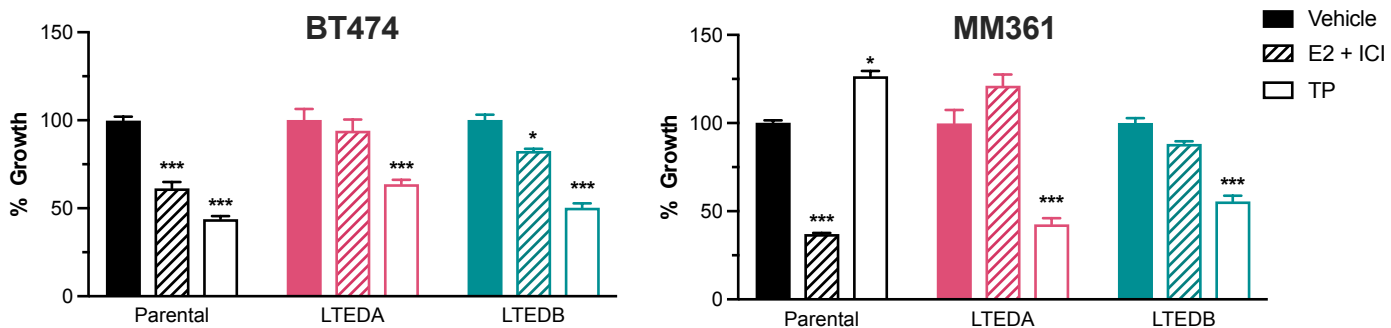

**A**

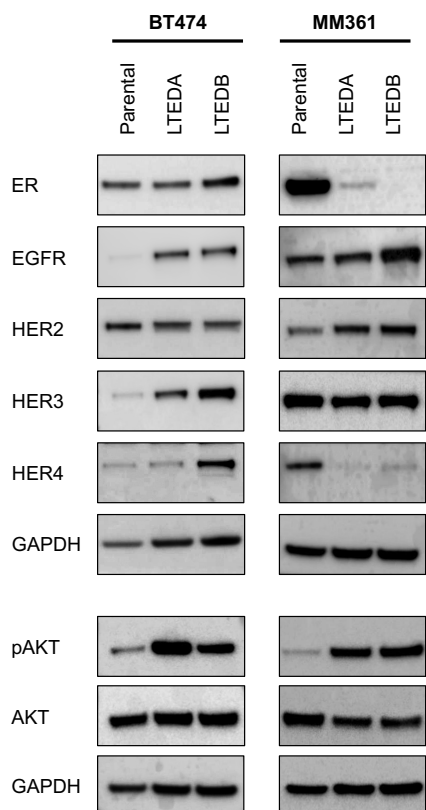

**B**

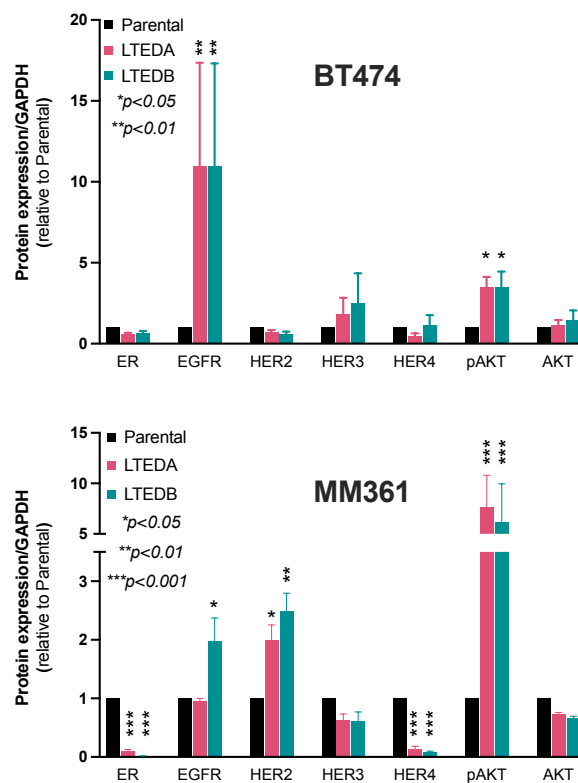

**C**

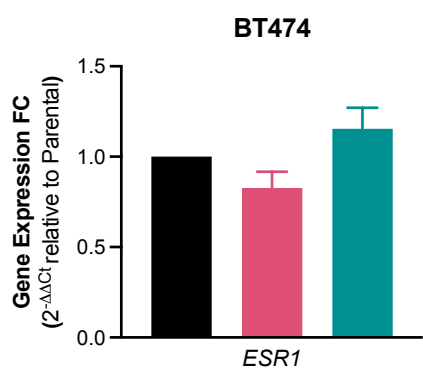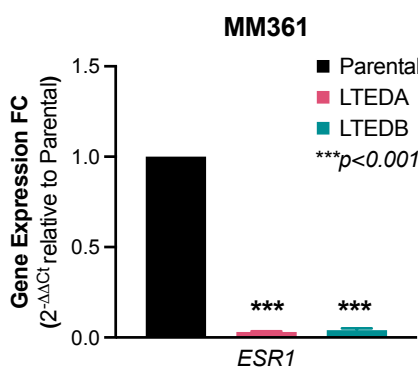

**D**

**Basal Expression**

**Estrogen-Induced Expression**

**BT474**

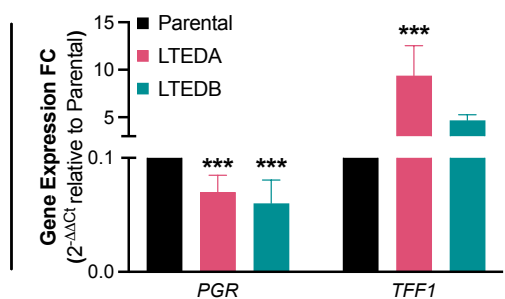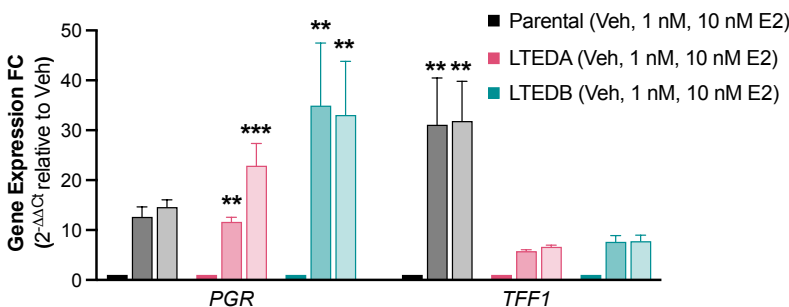

**MM361**

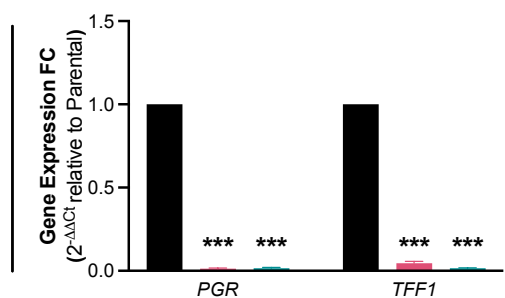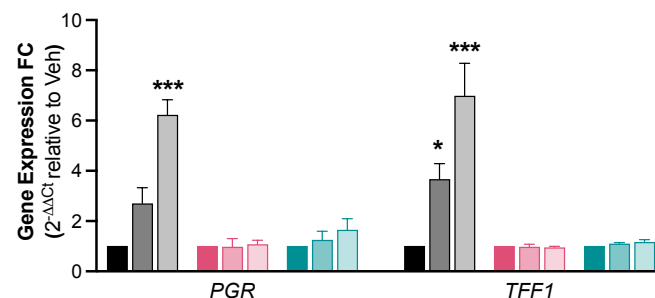

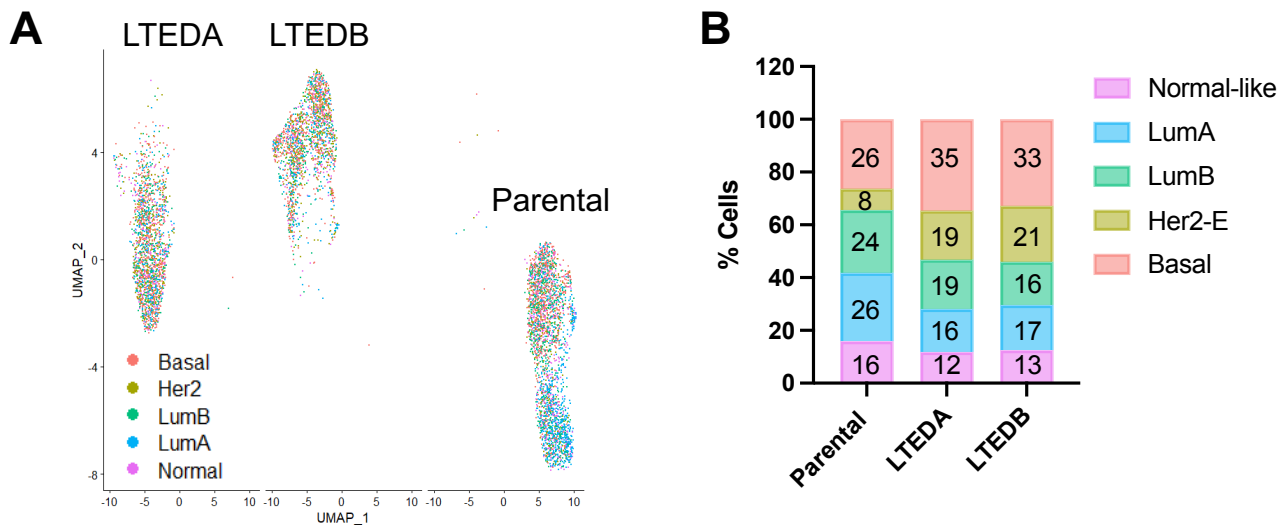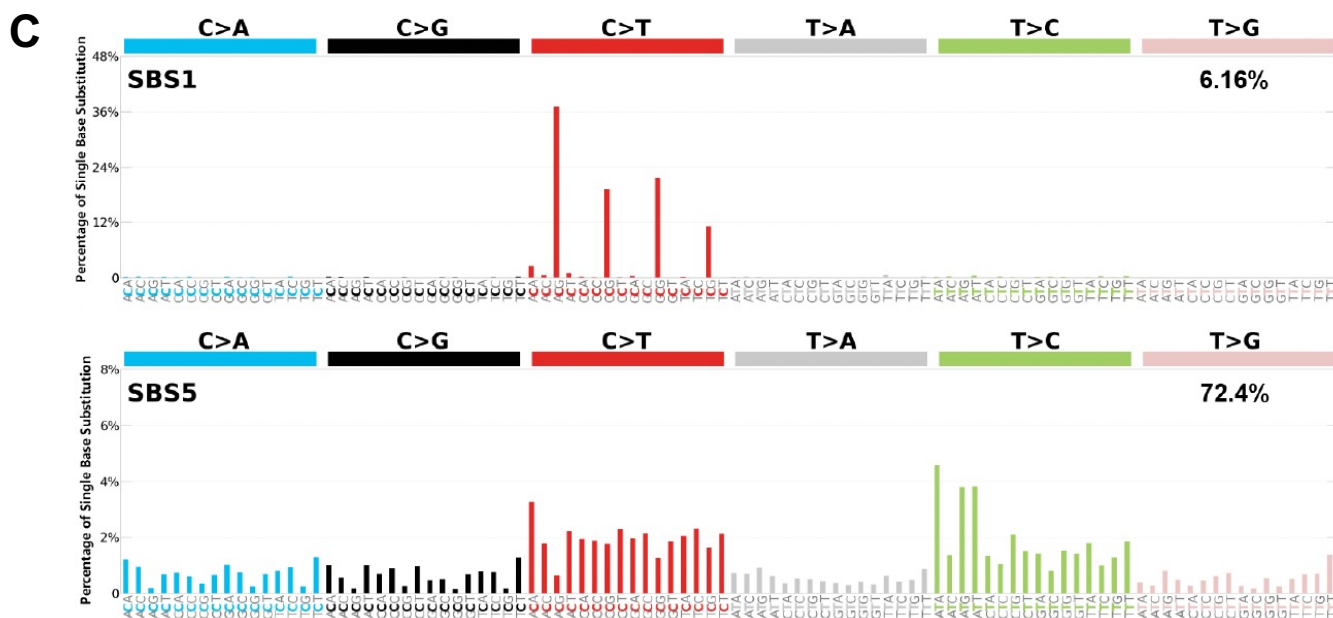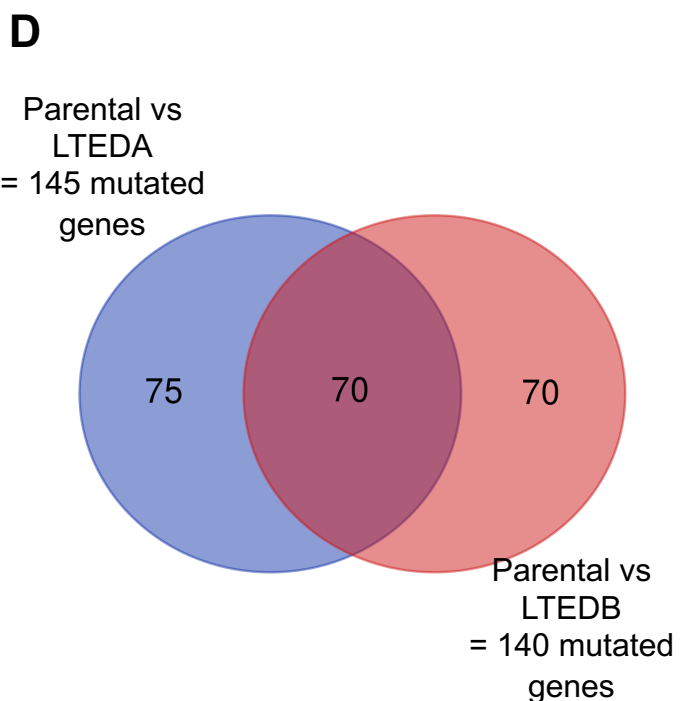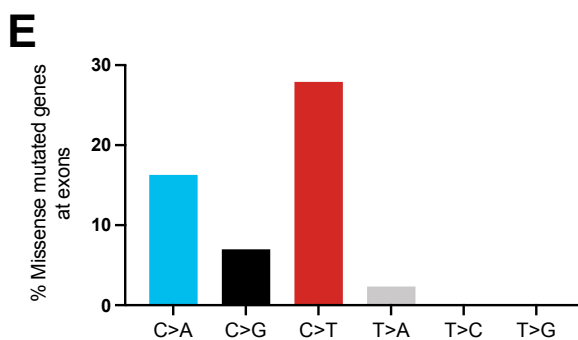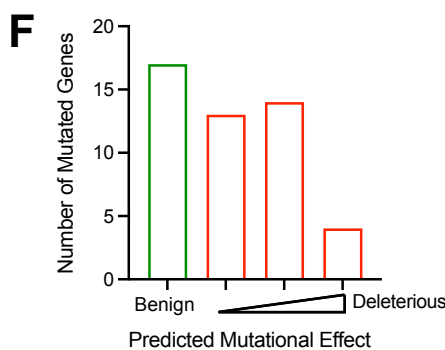

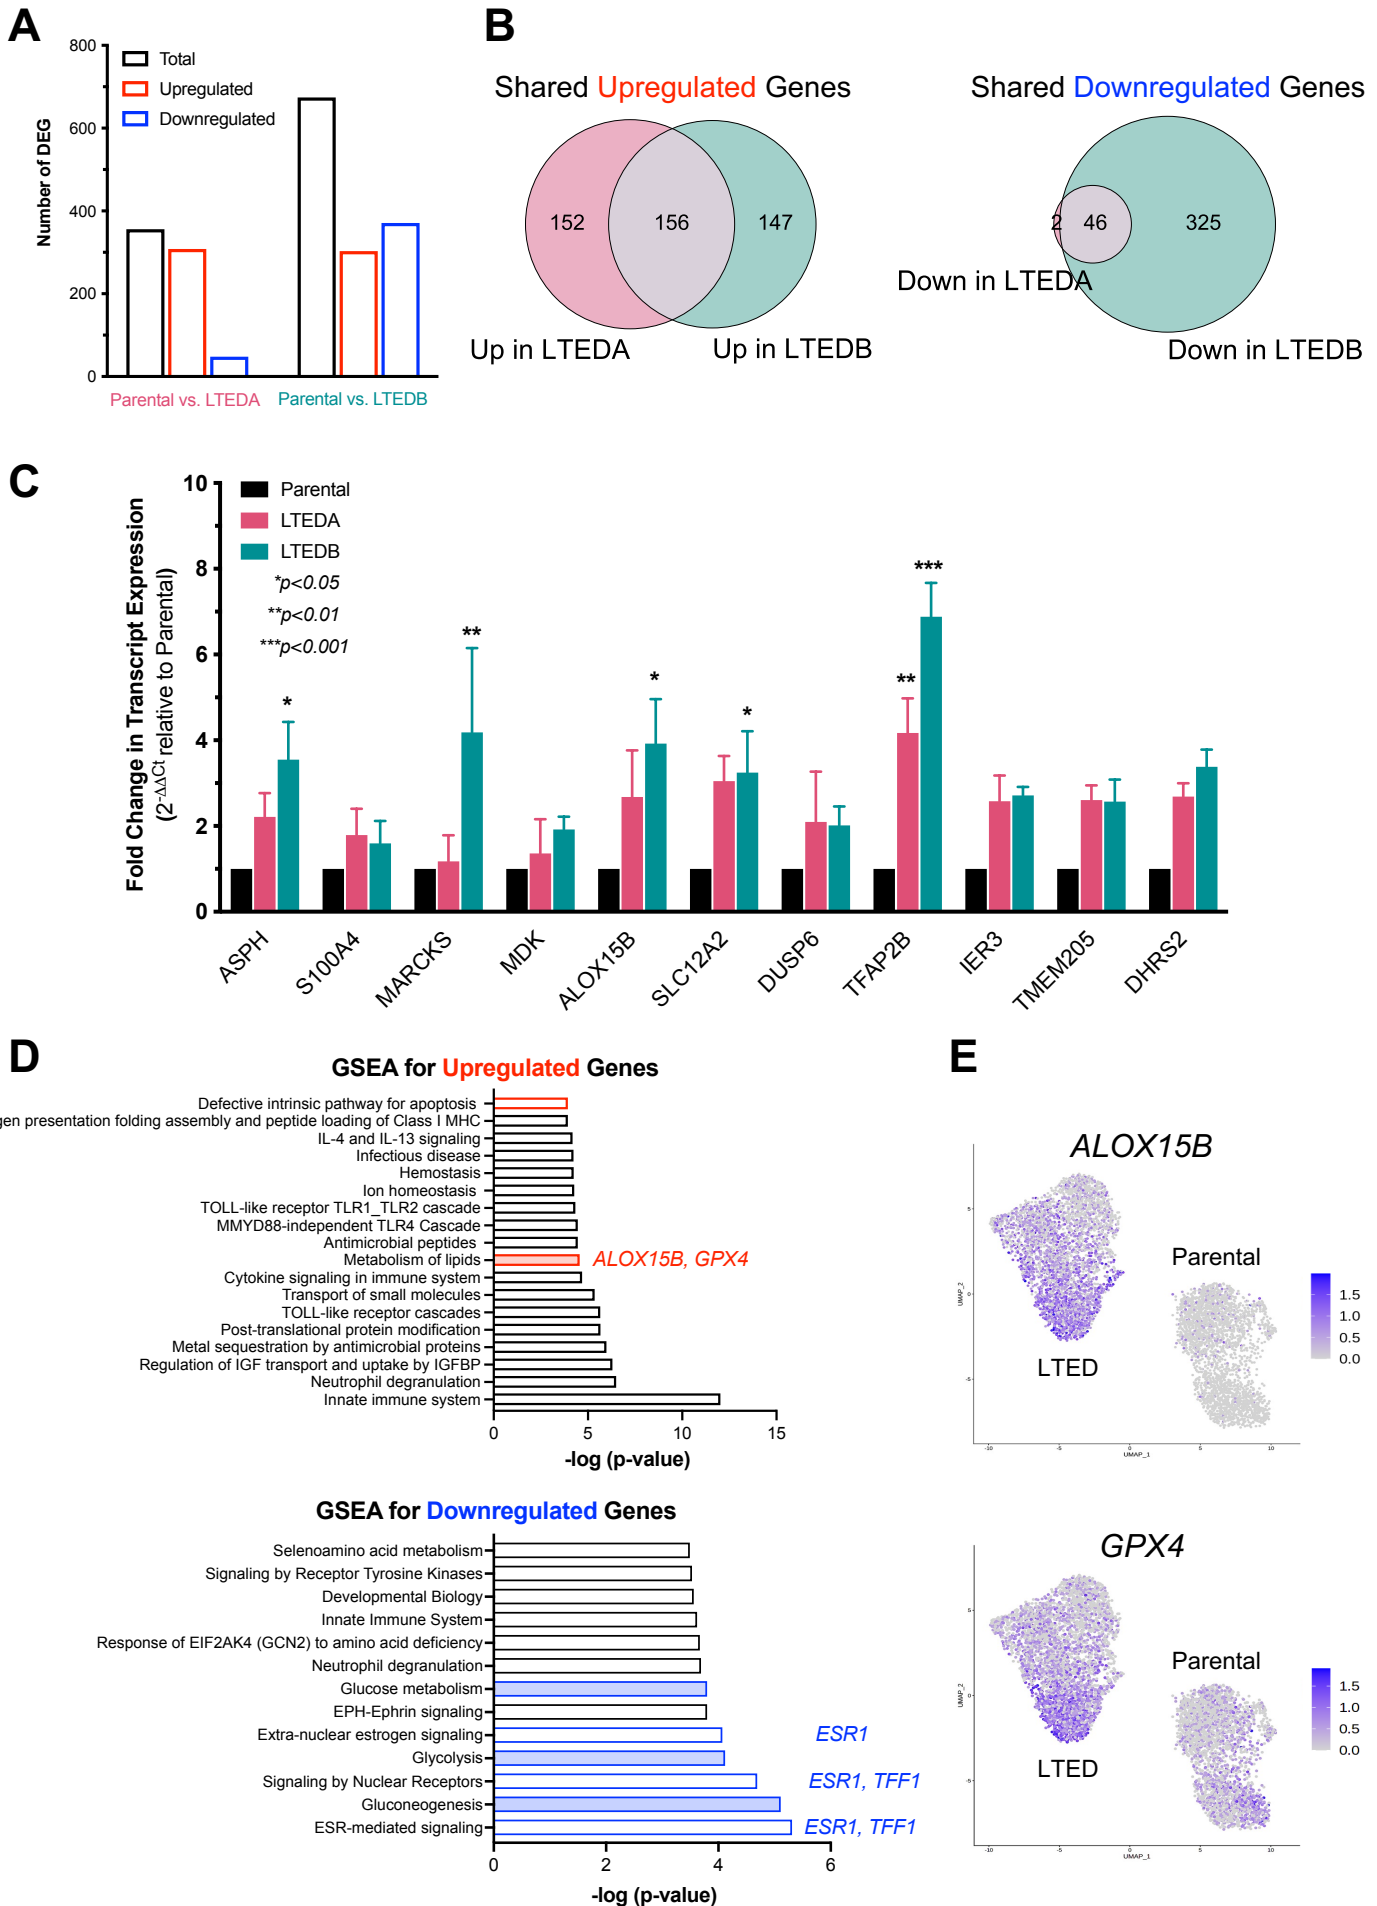



**Figure 6.**

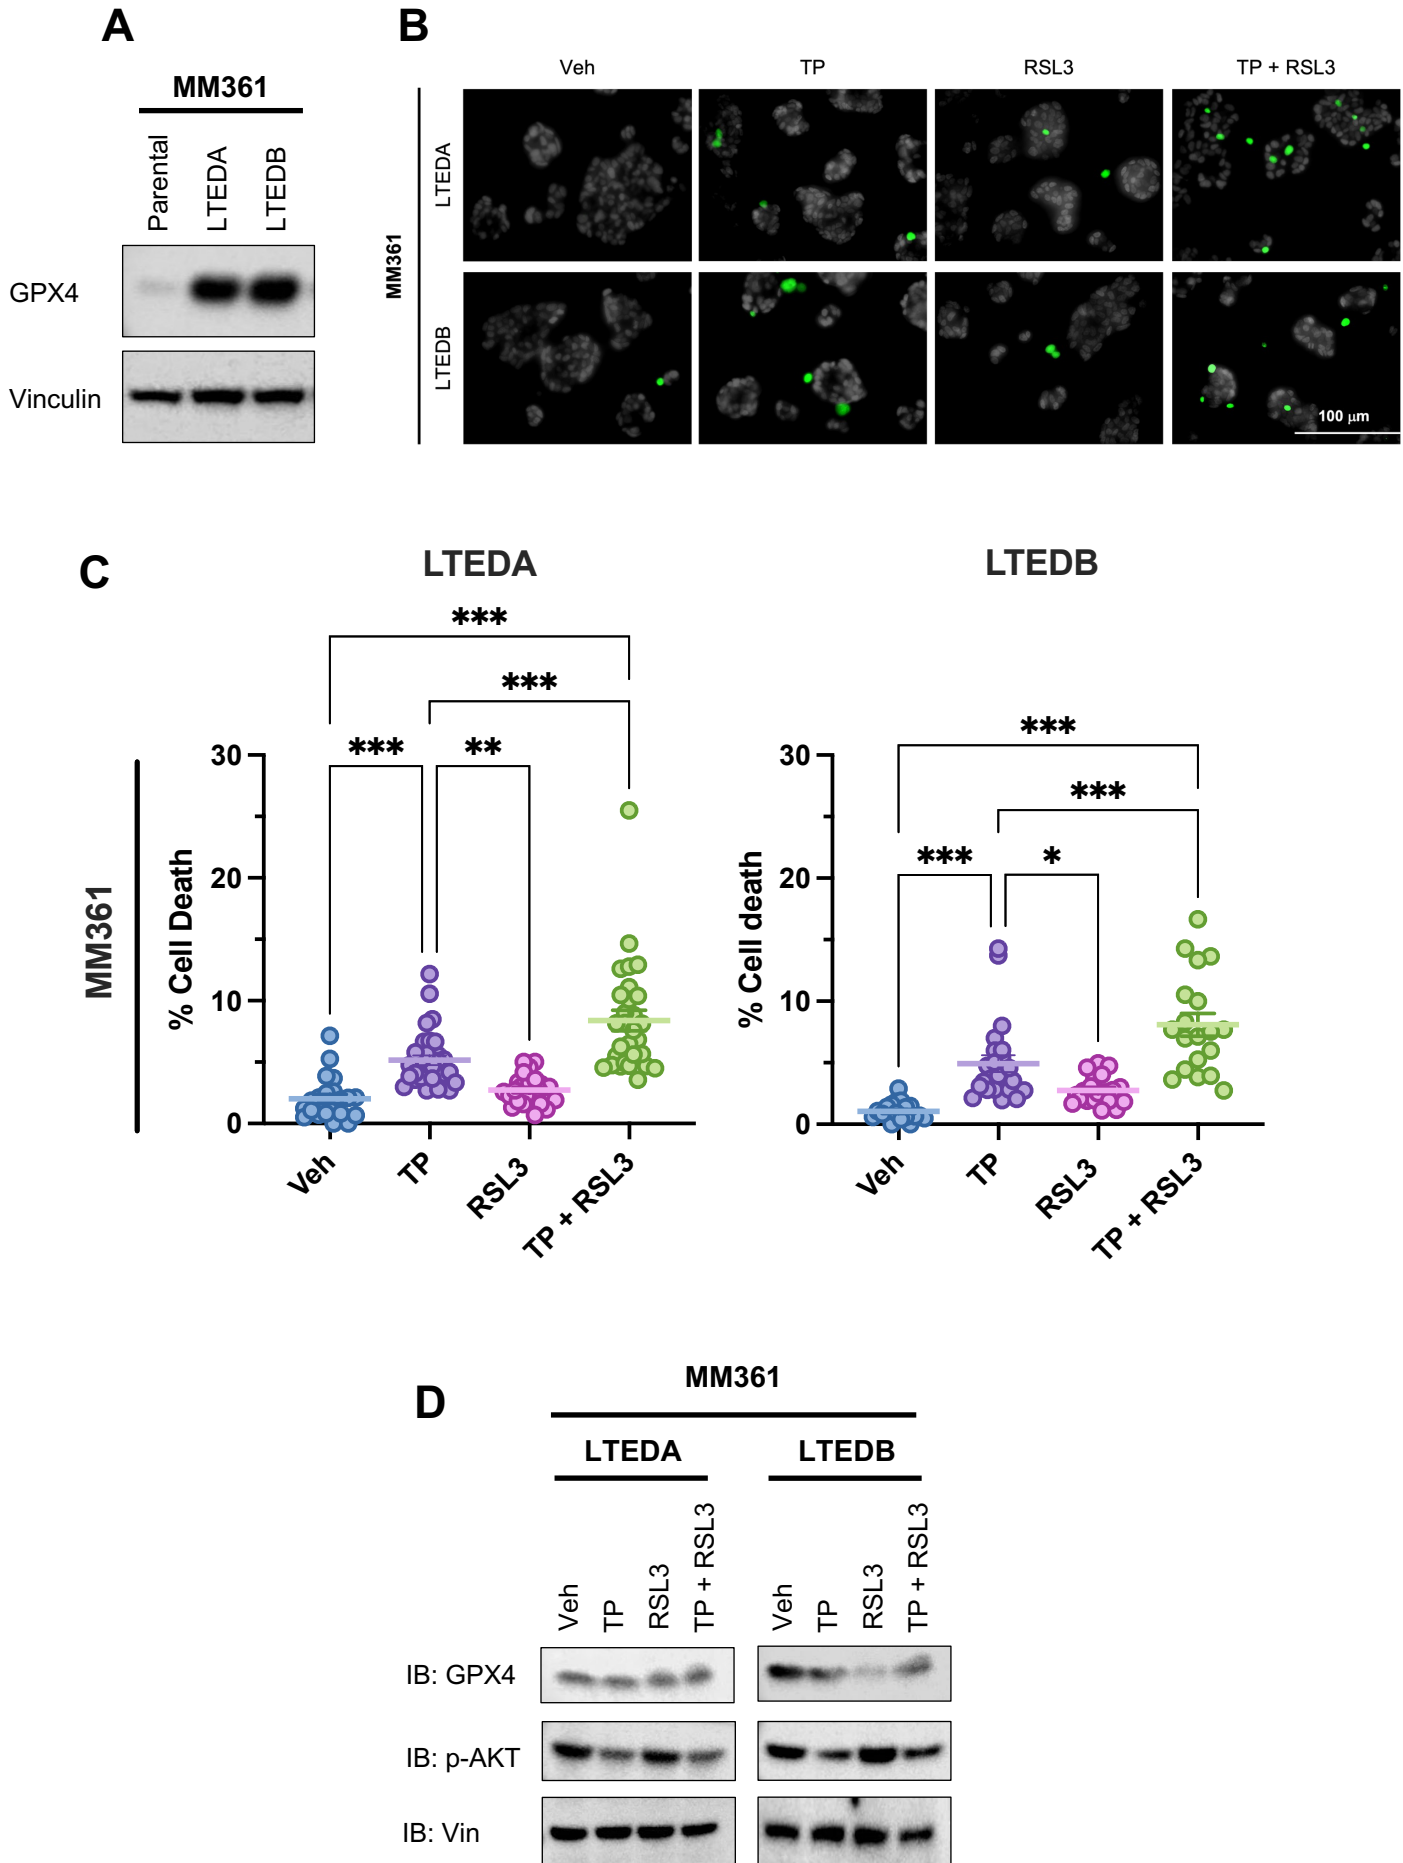

Source: https://www.biorxiv.org/content/10.1101/2023.08.21.554116v1.full.pdf
